# Supplementary material for: Intranasal antihistamines and corticosteroids in the treatment of allergic rhinitis: a systematic review and meta-analysis protocol
Source: PubMed Central journal article supplement — BMJ Open. 2023 Nov 2;13(11):e076614. doi: 10.1136/bmjopen-2023-076614 (PMC10626820; doi:10.1136/bmjopen-2023-076614), 2023-11-02
Supplement: bmjopen-2023-076614.draft_revisions.pdf [file bmjopen-2023-076614.draft_revisions.pdf]

# BMJ Open

BMJ Open is committed to open peer review. As part of this commitment we make the peer review history of every article we publish publicly available.

When an article is published we post the peer reviewers' comments and the authors' responses online. We also post the versions of the paper that were used during peer review. These are the versions that the peer review comments apply to.

The versions of the paper that follow are the versions that were submitted during the peer review process. They are not the versions of record or the final published versions. They should not be cited or distributed as the published version of this manuscript.

BMJ Open is an open access journal and the full, final, typeset and author-corrected version of record of the manuscript is available on our site with no access controls, subscription charges or pay-per-view fees (<http://bmjopen.bmj.com>).

If you have any questions on BMJ Open's open peer review process please email [info.bmjopen@bmj.com](mailto:info.bmjopen@bmj.com)

# BMJ Open

## Intranasal antihistamines and corticosteroids in the treatment of allergic rhinitis: A systematic review and meta-analysis protocol

|                               |                                                                                                                                                                                                                                                                                                                                                                                                                                                                                                                                                                                                                                                                                                                                                                                                                                                                                                                                                                                                                                                                                                                                                                                                                         |
|-------------------------------|-------------------------------------------------------------------------------------------------------------------------------------------------------------------------------------------------------------------------------------------------------------------------------------------------------------------------------------------------------------------------------------------------------------------------------------------------------------------------------------------------------------------------------------------------------------------------------------------------------------------------------------------------------------------------------------------------------------------------------------------------------------------------------------------------------------------------------------------------------------------------------------------------------------------------------------------------------------------------------------------------------------------------------------------------------------------------------------------------------------------------------------------------------------------------------------------------------------------------|
| Journal:                      | <i>BMJ Open</i>                                                                                                                                                                                                                                                                                                                                                                                                                                                                                                                                                                                                                                                                                                                                                                                                                                                                                                                                                                                                                                                                                                                                                                                                         |
| Manuscript ID                 | bmjopen-2023-076614                                                                                                                                                                                                                                                                                                                                                                                                                                                                                                                                                                                                                                                                                                                                                                                                                                                                                                                                                                                                                                                                                                                                                                                                     |
| Article Type:                 | Protocol                                                                                                                                                                                                                                                                                                                                                                                                                                                                                                                                                                                                                                                                                                                                                                                                                                                                                                                                                                                                                                                                                                                                                                                                                |
| Date Submitted by the Author: | 12-Jun-2023                                                                                                                                                                                                                                                                                                                                                                                                                                                                                                                                                                                                                                                                                                                                                                                                                                                                                                                                                                                                                                                                                                                                                                                                             |
| Complete List of Authors:     | Sousa-Pinto, Bernardo; University of Porto, MEDCIDS - Department of Community Medicine<br>Vieira, Rafael José; University of Porto, MEDCIDS - Department of Community Medicine<br>Brozek, Jan; McMaster University, Department of Health Research Methods, Evidence and Impact<br>Cardoso-Fernandes, António; University of Porto, MEDCIDS - Department of Community Medicine<br>Lourenço-Silva, Nuno; University of Porto, MEDCIDS - Department of Community Medicine<br>Ferreira-da-Silva, Renato; University of Porto, MEDCIDS - Department of Community Medicine<br>Ferreira, André; University of Porto; University of Porto, Department of Biomedicine<br>Gil-Mata, Sara; University of Porto<br>Bedbrook, Anna; MASK-air<br>Klimek, L.; Universitätsmedizin der Johannes Gutenberg-Universität Mainz<br>Fonseca, Joao A.; University of Porto<br>Zuberbier, Torsten; Charite Universitätsmedizin Berlin; Fraunhofer-Institut für Translationale Medizin und Pharmakologie ITMP<br>Schünemann, Holger; McMaster University, Department of Health Research Methods, Evidence and Impact<br>Bousquet, J.; Charite Universitätsmedizin Berlin; Fraunhofer-Institut für Translationale Medizin und Pharmakologie ITMP |
| Keywords:                     | Immunology < THORACIC MEDICINE, Asthma < THORACIC MEDICINE, Allergy < THORACIC MEDICINE, Chronic airways disease < THORACIC MEDICINE                                                                                                                                                                                                                                                                                                                                                                                                                                                                                                                                                                                                                                                                                                                                                                                                                                                                                                                                                                                                                                                                                    |
|                               |                                                                                                                                                                                                                                                                                                                                                                                                                                                                                                                                                                                                                                                                                                                                                                                                                                                                                                                                                                                                                                                                                                                                                                                                                         |

SCHOLARONE™  
Manuscripts

# Intranasal antihistamines and corticosteroids in the treatment of allergic rhinitis: A systematic review and meta-analysis protocol

Bernardo Sousa-Pinto<sup>1,2</sup>, Rafael José Vieira<sup>1,2</sup>, Jan Brozek<sup>3</sup>, António Cardoso-Fernandes<sup>1,2</sup>, Nuno Lourenço Silva<sup>1,2</sup>, Renato Ferreira-da-Silva<sup>1,2</sup>, André Ferreira<sup>2,4,5</sup>, Sara Gil-Mata<sup>6</sup>, Anna Bedbrook<sup>7</sup>, Ludger Klimek<sup>8,9</sup>, João A. Fonseca<sup>1,2</sup>, Torsten Zuberbier<sup>10,11</sup>, Holger J. Schünemann<sup>3</sup>, Jean Bousquet<sup>10-12</sup>

1 – MEDCIDS - Department of Community Medicine, Information and Health Decision Sciences; Faculty of Medicine, University of Porto, Porto, Portugal

2 – CINTESIS@RISE - Health Research Network, MEDCIDS, Faculty of Medicine, University of Porto, Porto, Portugal

3 – Department of Health Research Methods, Evidence, and Impact & Department of Medicine, McMaster University, Hamilton, ON, Canada

4 – Unit of Anatomy, Department of Biomedicine, Faculty of Medicine, University of Porto, Porto, Portugal

5 – Department of Ophthalmology, Centro Hospitalar Universitário do Porto, Porto, Portugal

6 – Faculty of Medicine, University of Porto, Porto, Portugal

7 – MASK-air SAS, Montpellier, France

8 – Department of Otolaryngology, Head and Neck Surgery, Universitätsmedizin Mainz, Mainz, Germany

9 – Center for Rhinology and Allergology, Wiesbaden, Germany

10 – Institute of Allergology, Charité – Universitätsmedizin Berlin, Corporate Member of Freie Universität Berlin and Humboldt-Universität zu Berlin, Berlin, Germany

11 – Fraunhofer Institute for Translational Medicine and Pharmacology ITMP, Allergology and Immunology, Berlin, Germany

12 – ARIA, Montpellier, France

**Corresponding author:** Professor Jean Bousquet, Fraunhofer Institute for Translational Medicine and Pharmacology ITMP, Allergology and Immunology, Berlin, Germany; Telephone: +33 611 42 88 47; Mail: jean.bousquet@orange.fr

1  
2  
3 **Word count:** 1868 words  
4

5 **Registration:** Protocol registration being assessed in PROSPERO (ID: 416573)  
6  
7

8 **Amendments:** This protocol does not represent an amendment of a previously completed or published  
9 protocol. Eventual important protocol amendments will be reported in the systematic review.  
10  
11  
12  
13  
14  
15  
16  
17  
18  
19  
20  
21  
22  
23  
24  
25  
26  
27  
28  
29  
30  
31  
32  
33  
34  
35  
36  
37  
38  
39  
40  
41  
42  
43  
44  
45  
46  
47  
48  
49  
50  
51  
52  
53  
54  
55  
56  
57  
58  
59  
60

For peer review only

## Abstract

**Introduction:** Intranasal antihistamines and corticosteroids are some of the most frequently used drug classes in the treatment of allergic rhinitis. However, there is uncertainty as to whether effectiveness differences may exist among different intranasal specific medications. This systematic review aims to analyse and synthesise all evidence from randomised controlled trials (RCTs) on the effectiveness of intranasal antihistamines and corticosteroids in rhinitis nasal and ocular symptoms and in rhinoconjunctivitis-related quality-of-life.

**Methods and analysis:** We will search four electronic bibliographic databases and three clinical trials databases for RCTs (i) assessing adult patients with seasonal or perennial allergic rhinitis and (ii) comparing the use of intranasal antihistamines or corticosteroids *versus* placebo. Assessed outcomes will include the Total Nasal Symptom Score (TNSS), the Total Ocular Symptom Score (TOSS) and the Rhinoconjunctivitis Quality-of-Life Questionnaire (RQLQ). We will assess the methodological quality of included primary studies by using the Cochrane risk-of-bias tool. Certainty in the body of evidence for the analysed outcomes will be assessed using the GRADE approach. We will perform a random-effects meta-analysis for each assessed medication and outcome, presenting results as pooled mean differences and standardised mean differences. Heterogeneity will be explored by sensitivity and subgroup analyses, considering the risk of bias, follow-up period and drug dose of the primary studies.

**Ethics and dissemination:** Ethical considerations will not be required. Results will be disseminated in a peer-review journal.

### Strengths and limitations of this study:

- We will analyse evidence from randomised controlled trials assessing intranasal antihistamines and corticosteroids, two of the most frequently used drug classes in the treatment of allergic rhinitis.
- We will perform meta-analysis on three relevant outcomes, exploring sources of heterogeneity based on the risk of bias, follow-up period or doses of the drugs (among others).
- There will be some limitations stemming from the fact that (i) only trials assessing adults and (ii) only comparisons against placebo will be considered.

## Introduction

Allergic rhinitis is a common chronic condition with a prevalence of up to 50% in some countries<sup>1</sup>. While not being potentially fatal, allergic rhinitis has a relevant impact on work and school productivity, as well as on patients' quality of life<sup>2-4</sup>. Pharmacological interventions for allergic rhinitis have evolved over the last decades, with the current mainstay treatment including oral or intranasal antihistamines, intranasal steroids and fixed combinations of intranasal steroids + antihistamines. In this context, the 2020 Allergic Rhinitis and Its Impact on Asthma (ARIA) guidelines preferentially favour the use of intranasal medication, considering that (i) intranasal steroids or fixed combinations of intranasal steroids + antihistamines display higher effectiveness than oral or intranasal antihistamines and (ii) intranasal treatments display a faster onset of action than oral ones<sup>5</sup>. However, for most recommendations, the level of evidence was reported to be "low" or "very low"<sup>5</sup>. In addition, there is insufficient evidence as to whether effectiveness differences may exist among different intranasal specific medications. This prompts the need for a systematic assessment – using a standardised approach – on the effectiveness of each specific intranasal antihistamine or steroid. This is even more relevant given not only a large amount of evidence unpublished in scientific journals but also the fact that randomised controlled trials (RCTs) assessing the effectiveness of intranasal rhinitis medications are quite heterogeneous on their methodological quality and methods for outcome assessment (e.g., scores used to quantify nasal or ocular symptoms).

Therefore, the main aim of this systematic review will be to analyse and synthesise all evidence from randomised controlled trials (RCT) on the efficacy of intranasal antihistamines and intranasal steroids in rhinitis nasal and ocular symptoms and in rhinoconjunctivitis-related quality-of-life. The obtained results will allow us not only to acquire pooled meta-analytical estimates on the efficacy of each specific drug, but also to assess the certainty in the existing body of evidence.

## Methods and analyses

We will perform a systematic review of RCTs assessing the efficacy of intranasal antihistamines and/or corticosteroids in the treatment of patients with allergic rhinitis. This systematic review will follow the Preferred Reporting Items for Systematic Reviews and Meta-Analyses (PRISMA) guidelines<sup>6</sup>.

## Eligibility criteria

We will include RCTs assessing patients  $\geq 12$  years old with seasonal or perennial allergic rhinitis and comparing the use of intranasal antihistamines or corticosteroids or their combination *versus* placebo (direct comparisons between active drugs will not be considered) on at least one of the following patient-reported outcome measures (selected as they correspond to the most common efficacy outcomes assessed in rhinitis trials, providing information on different disease domains): Total Nasal Symptom Score (TNSS), Total Ocular Symptom Score (TOSS), Total Symptom Score (TSS), or

Rhinoconjunctivitis Quality of Life Questionnaire (RQLQ). We define the TNSS as any score computed based on the sum of several patient-reported scores for individual nasal symptoms. Accordingly, we define the TOSS as any score computed based on the sum of several patient-reported scores for individual ocular symptoms, while the TSS implies the combination of different types of rhinitis symptoms (e.g., nasal, ocular and/or palate symptoms). The TNSS, TOSS and TSS will be assessed in a reflective manner; that is, as reflecting the patient's symptoms in the previous 12 or 24 hours. The following intranasal drugs will be considered: azelastine, azelastine-fluticasone, beclomethasone, budesonide, ciclesonide, fluticasone furoate, fluticasone propionate, levocabastine, mometasone furoate, olopatadine, olopatadine-mometasone and triamcinolone. We will only include RCTs with a parallel design, given the difficulties associated with cross-over studies associated with the duration of the pollen season (for seasonal allergic rhinitis) and with symptom attenuation (for perennial allergic rhinitis). In addition, considering Food and Drug Administration recommendations<sup>7</sup>, we will only include studies with a follow-up period of at least two weeks if assessing patients with seasonal allergic rhinitis or at least four weeks if assessing patients with perennial allergic rhinitis.

We will exclude RCTs assessing patients with seasonal allergic rhinitis that are not conducted during the pollen season or in which treatment started before the beginning of the pollen season. No exclusion criteria will be applied based on the publication language, date or status.

### **Information sources and search strategy**

We will search MEDLINE (via Ovid), Web of Science, Embase and CENTRAL (Cochrane Central Register of Controlled Trials) from database inception. In addition, we will manually search the clinicaltrials.gov, the GSK clinical study dataset and the AstraZeneca Clinical Trials Website in order to identify potentially unpublished trials. Search queries to be applied are listed in the Supplementary Table 1.

### **Study selection and data collection**

After duplicates removal, each record will be independently assessed by two authors, first by title and abstract screening and subsequently by full-text reading. For each included record, we will assess whether additional publications from the same study are available (in order to avoid duplication of information from the same participants). Two reviewers will independently extract data from each included primary study using a purpose-built online form (a pilot version of the form will be initially developed, with the definitive version being made available after the assessment of the first three RCTs). From each study, we will retrieve information on (i) the assessed disease (seasonal *versus* perennial allergic rhinitis), (ii) the participants' inclusion and exclusion criteria (as stated in the each study's description), (iii) the data collection period, (iv) the places from where patients were recruited, (v) the active treatment daily dose, (vi) the follow-up period, (vii) the number of randomised participants (as

1  
2  
3 well as their age and gender distribution) and (viii) the number of participants completing the trial  
4 (despite that, for each outcome, we will assess the effects among all patients who had the outcome  
5 measured). We will also extract the information required to assess the risk of bias in each study. In  
6 addition, for each reported outcome (TNSS, TOSS, TSS and/or RQLQ), we will retrieve information  
7 on the scale and computation method, baseline values and post-intervention and/or change from  
8 baseline values, when available. If results are only provided in graphs, estimates will be obtained using  
9 the PlotDigitizer tool (<https://plotdigitizer.com/>).

10  
11  
12 Disagreements between reviewers in data selection or extraction will be solved by consensus or by a  
13 third reviewer. Authors of included primary studies will be contacted to provide missing information.

### 14 15 16 17 18 **Risk of bias and certainty assessment**

19  
20  
21 The risk of bias of each included primary study will be independently assessed by two researchers using  
22 the Cochrane Risk of Bias tool. For the “blinding of outcome assessment” and “incomplete outcome  
23 data” items, assessments will be separately performed for each reported outcome. The risk of selective  
24 reporting will be assessed not only by reading the study’s methods, but also by analysing the trial  
25 protocol or registration if available. Disagreements between reviewers will be solved by consensus or  
26 by a third reviewer.

27  
28  
29  
30  
31 Certainty in the body of evidence for each outcome and across outcomes will be assessed using the  
32 GRADE approach<sup>8</sup>. In order to assess whether a strong association is obtained, we will analyse not only  
33 whether the meta-analytical point estimate for each outcome is higher than the minimal important  
34 difference, but also whether such value is not contained in the respective confidence interval. For  
35 RQLQ, on a 0-6 scale, we will consider a minimal important difference of 0.5<sup>9</sup>. For the TNSS, on a 0-  
36 12 scale, we will consider a minimal important difference of 0.28 (following the work of Barnes et  
37 al.<sup>10</sup>).

### 38 39 40 41 42 **Quantitative synthesis of results**

43  
44  
45 All assessed outcomes are continuous. Therefore, for each group in each primary study, we will present  
46 the mean ( $\pm$  standard-deviation) baseline and change-from-baseline value for all outcomes of interest.  
47 Any missing information on spread measures (standard-deviation, standard-error or variance) will be  
48 estimated using the algorithm suggested by Weir et al.<sup>11</sup> (itself an adaptation of that proposed by Weibe  
49 et al.<sup>12</sup>) and in accordance with Cochrane recommendations<sup>13</sup>. In summary, we will attempt to apply  
50 one of the following methods in the following hierarchical order: (i) use of algebraic recalculation to  
51 recover missing data, (ii) contacting of study authors to retrieve missing data, (iii) use of approximate  
52 algebraic calculations based on other study-level measures (e.g., range or quartiles), (iv) use of multiple  
53 imputation methods, (v) use of non-parametric summaries, (vi) use of single-imputation methods, (vii)  
54 summary of non-pooled data alongside meta-analysed results in the systematic review text (Figure 1).



1  
2  
3 As recommended by the Cochrane handbook, (i) obtention of missing data based on the methods iii-vii  
4 will only occur if missing data occurs in a small proportion of studies, and (ii) sensitivity analyses will  
5 always be performed to assess the impact of dealing with missing data<sup>13</sup>.  
6  
7

8 We will perform random-effects meta-analyses of mean differences (MD; if scores are measured using  
9 the same scale) or standardised-mean differences (SMD; if scores are measured using different scales)  
10 in change-from-baseline values (active treatment *versus* placebo). For outcomes calculated based on  
11 the same symptoms and giving the same weight to each symptom but with results presented in different  
12 scales (e.g., two studies calculating the TNSS based on the same symptoms, but with one presenting  
13 the results on a scale of 0-12 and another on a scale 0-24), scales will be reconverted into a scale of 0-  
14 12 for the TNSS and of 0-9 for the TOSS. Separate meta-analyses will be performed for patients with  
15 seasonal and perennial allergic rhinitis.  
16  
17  
18  
19  
20  
21

22 The restricted maximum likelihood approach will be used to estimate between-study variance.  
23 Heterogeneity will be assessed by estimating the *p*-value of the Q-Cochran test and by the *I*<sup>2</sup> statistic.  
24 Irrespective of the amount of detected heterogeneity, sensitivity analyses will be performed excluding  
25 studies (i) with high risk of bias, and (ii) in which algebraic calculations needed to be performed to  
26 estimate missing data, (iii) based on the follow-up period of the study, and (iv) based on the doses of  
27 the drugs being assessed. In the presence of substantial heterogeneity, leave-one-out sensitivity analyses  
28 will also be performed.  
29  
30  
31  
32

33 All analyses will be performed using software R, with the use of the metafor and meta packages.  
34  
35

### 36 **Patient and Public Involvement statement**

37  
38 There will be no Patient or Public Involvement in this study.  
39

### 40 **Ethics and dissemination**

41  
42  
43 Ethical considerations will not be required. Results will be disseminated in a peer-review journal. Data  
44 can be made available from the corresponding author upon reasonable request.  
45  
46

### 47 **Discussion**

48  
49 This systematic review and meta-analysis will be a first step to assess the efficacy of specific intranasal  
50 antihistamines and corticosteroids in the treatment of allergic rhinitis. While there will be some  
51 limitations in terms of generalisability (e.g., as only RCTs with adults will be included) or related to the  
52 fact that only comparisons against placebo will be considered, these limitations may be overcome by  
53 future complementary studies (e.g., a systematic review of RCTs in paediatric patients or a network  
54 meta-analysis on intranasal treatments for allergic rhinitis).  
55  
56  
57  
58  
59  
60

1  
2  
3 Our study will synthesise data from RCTs to determine the impact of intranasal antihistamines and  
4 corticosteroids on nasal symptoms, ocular symptoms and quality of life of patients with allergic rhinitis.  
5 In addition, it will enable us to assess the methodological quality and certainty in the body of existing  
6 evidence, allowing us to make robust conclusions on the efficacy of these treatments. The findings of  
7 this systematic review may support recommendations in future guidelines on allergic rhinitis treatment,  
8 as well as lay the basis for a future network meta-analysis, taking into account both direct and indirect  
9 comparisons between specific drugs.  
10  
11  
12  
13

14  
15 **Authors' contributions:** BSP, RJV, JAF and JB participated in the study design and in the drafting of  
16 the protocol manuscript. JB, ACF, NLS, RFS, AF, SGM, AB, LK, TZ and HJS participated in the study  
17 design and in the critical revision of the manuscript. JB is the guarantor of the review.  
18  
19

20  
21 **Funding statement:** The work of this study has been funded within the context of the Allergic Rhinitis  
22 and its Impact on Asthma (ARIA) group.  
23

24 **Competing interest statement:**

25  
26 L. Klimek reports grants from Allergopharma, MEDA/Mylan, ALK Abelló, LETI Pharma,  
27 Stallergenes, Sanofi, ASIT biotech, Lofarma Quintiles, AstraZeneca, GSK, and Immunotk; and personal  
28 fees from Allergopharma, MEDA/Mylan, HAL Allergie, LETI Pharma, Sanofi, Allergy Therapeut, and  
29 Cassella Med, outside the submitted work.  
30  
31

32  
33 J. A Fonseca reports grants from Astrazeneca and Mundipharma; and personal fees from AstraZeneca,  
34 Mundipharma, Sanofi, GSK, and Teva, outside the submitted work.  
35  
36

37 T. Zuberbier reports grants from Novartis and Henkel; personal fees from Bayer Health Care, FAES,  
38 Novartis, Henkel, AstraZeneca, AbbVie, ALK, Almirall, Astellas, Bencard, Berlin Chemie, HAL, Leti,  
39 Meda, Menarini, Merck, MSD, Pfizer, Sanofi, Stallergenes, Takeda, Teva, UCB, Kryolan, and L'Oréal,  
40 outside the submitted work.  
41  
42  
43

44 J. Bousquet reports personal fees from Chiesi, Cipla, Hikma, Menarini, Mundipharma, Mylan, Novartis,  
45 Purina, Sanofi-Aventis, Takeda, Teva, and Uriach; and other from Kyomed-Innov, outside the  
46 submitted work.  
47  
48  
49  
50  
51  
52  
53  
54  
55  
56  
57  
58  
59  
60

## References

1. Bousquet J, Anto JM, Bachert C, et al. Allergic rhinitis. *Nat Rev Dis Primers*. Dec 3 2020;6(1):95. doi:10.1038/s41572-020-00227-0
2. Thompson AK, Juniper E, Meltzer EO. Quality of life in patients with allergic rhinitis. *Ann Allergy Asthma Immunol*. Nov 2000;85(5):338-47; quiz 347-8. doi:10.1016/S1081-1206(10)62543-4
3. Vandenplas O, Vinnikov D, Blanc PD, et al. Impact of Rhinitis on Work Productivity: A Systematic Review. *J Allergy Clin Immunol Pract*. Jul-Aug 2018;6(4):1274-1286 e9. doi:10.1016/j.jaip.2017.09.002
4. Vieira RJ, Pham-Thi N, Anto JM, et al. Academic Productivity of Young People With Allergic Rhinitis: A MASK-air Study. *J Allergy Clin Immunol Pract*. Nov 2022;10(11):3008-3017 e4. doi:10.1016/j.jaip.2022.08.015
5. Bousquet J, Schunemann HJ, Togias A, et al. Next-generation Allergic Rhinitis and Its Impact on Asthma (ARIA) guidelines for allergic rhinitis based on Grading of Recommendations Assessment, Development and Evaluation (GRADE) and real-world evidence. *J Allergy Clin Immunol*. Jan 2020;145(1):70-80 e3. doi:10.1016/j.jaci.2019.06.049
6. Page MJ, McKenzie JE, Bossuyt PM, et al. The PRISMA 2020 statement: an updated guideline for reporting systematic reviews. *BMJ*. Mar 29 2021;372:n71. doi:10.1136/bmj.n71
7. Food and Drug Administration. *Allergic Rhinitis: Developing Drug Products for Treatment - Guidance for Industry*. 2018. <https://www.fda.gov/files/drugs/published/Allergic-Rhinitis--Developing-Drug-Products-for-Treatment-Guidance-for-Industry.pdf>
8. Brozek JL, Akl EA, Alonso-Coello P, et al. Grading quality of evidence and strength of recommendations in clinical practice guidelines. Part 1 of 3. An overview of the GRADE approach and grading quality of evidence about interventions. *Allergy*. May 2009;64(5):669-77. doi:10.1111/j.1398-9995.2009.01973.x
9. Juniper EF, Guyatt GH, Griffith LE, Ferrie PJ. Interpretation of rhinoconjunctivitis quality of life questionnaire data. *J Allergy Clin Immunol*. Oct 1996;98(4):843-5. doi:10.1016/s0091-6749(96)70135-5
10. Barnes ML, Vaidyanathan S, Williamson PA, Lipworth BJ. The minimal clinically important difference in allergic rhinitis. *Clin Exp Allergy*. Feb 2010;40(2):242-50. doi:10.1111/j.1365-2222.2009.03381.x
11. Weir CJ, Butcher I, Assi V, et al. Dealing with missing standard deviation and mean values in meta-analysis of continuous outcomes: a systematic review. *BMC Med Res Methodol*. Mar 7 2018;18(1):25. doi:10.1186/s12874-018-0483-0
12. Wiebe N, Vandermeer B, Platt RW, Klassen TP, Moher D, Barrowman NJ. A systematic review identifies a lack of standardization in methods for handling missing variance data. *J Clin Epidemiol*. Apr 2006;59(4):342-53. doi:10.1016/j.jclinepi.2005.08.017
13. Higgins JP, Thomas J, Chandler J, et al. *Cochrane handbook for systematic reviews of interventions*. John Wiley & Sons; 2019.

**Figure 1. Approach that will be followed to estimate missing standard-deviation data from included primary studies**

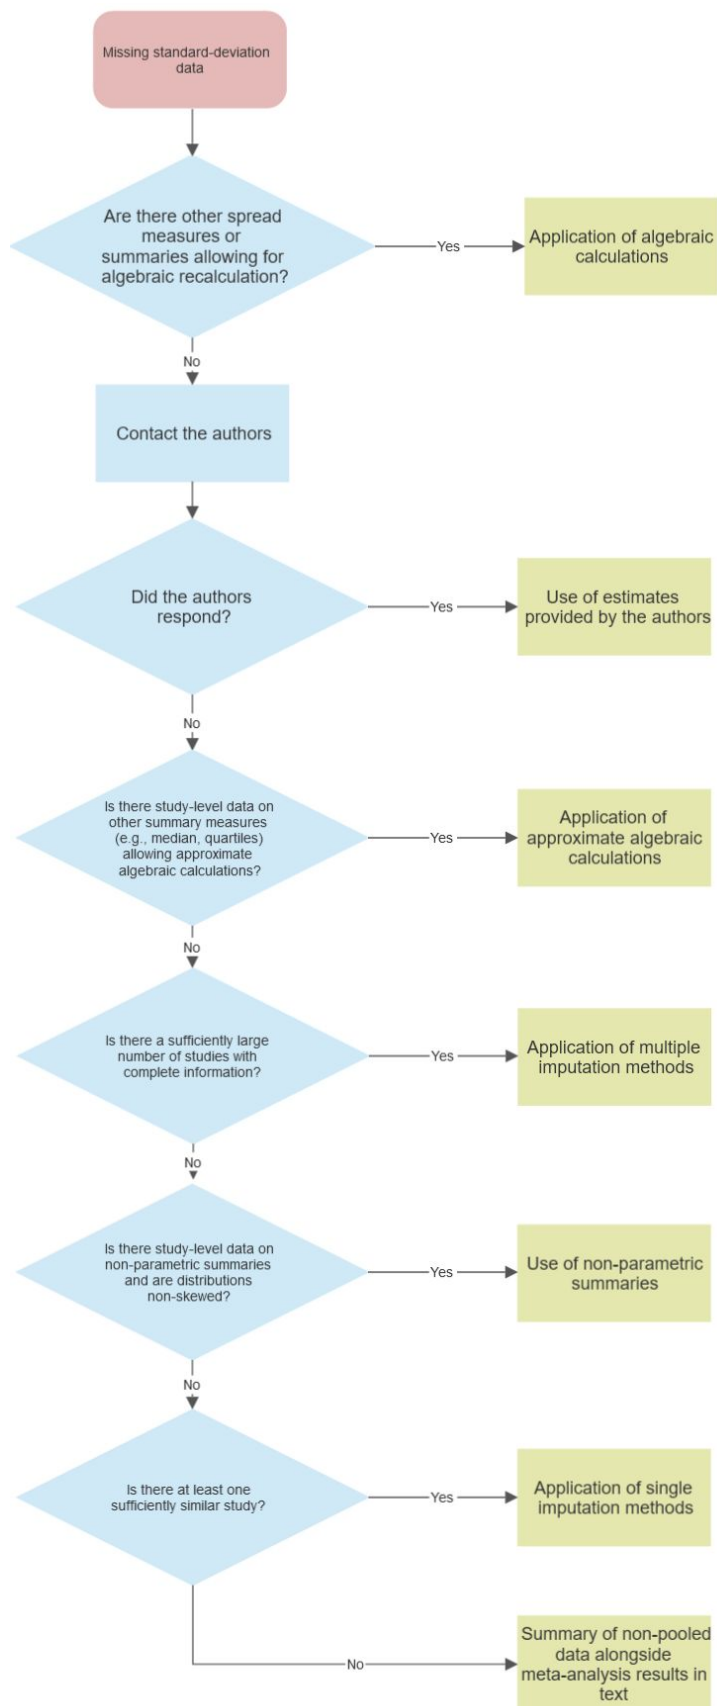

Peer review only

## Supplementary Material

Supplementary Table 1. Queries applied in the different bibliographic databases

| MEDLINE (Ovid) |                                   |
|----------------|-----------------------------------|
| 1              | azelastin\$.mp.                   |
| 2              | azelastine-fluticasone.mp.        |
| 3              | azeflu.mp.                        |
| 4              | MP-azeflu.mp.                     |
| 5              | (azelastine adj2 fluticasone).mp. |
| 6              | dymista.mp.                       |
| 7              | azecort.mp.                       |
| 8              | olopatadin\$.mp.                  |
| 9              | olopatadine-mometasone.mp.        |
| 10             | (olopatadine adj2 mometasone).mp. |
| 11             | gsp301.mp.                        |
| 12             | ryaltris.mp.                      |
| 13             | levocabastin\$.mp.                |
| 14             | lexicomp.mp.                      |
| 15             | ciclesonid\$.mp.                  |
| 16             | Alvesco.mp.                       |
| 17             | fluticason\$.mp.                  |
| 18             | GW685698X.mp.                     |
| 19             | mometason\$.mp.                   |
| 20             | beclometason\$.mp.                |
| 21             | budesonid\$.mp.                   |
| 22             | triamcinolon\$.mp.                |
| 23             | azelastine.nm.                    |
| 24             | levocabastine.nm.                 |
| 25             | ciclesonide.nm.                   |
| 26             | exp Olopatadine Hydrochloride/    |
| 27             | exp Fluticasone/                  |
| 28             | exp Mometasone Furoate/           |
| 29             | exp Beclomethasone/               |
| 30             | exp Budesonide/                   |
| 31             | exp Triamcinolone/                |
| 32             | exp Rhinitis/                     |

- 1  
2  
3 33 (rhinit\$ or rhinoconjunctivit\$).mp.  
4  
5 34 exp Allergic Rhinitis/  
6  
7 35 (hayfever or "hay fever" or pollenosis or pollinosis or SAR).mp.  
8  
9 36 (spray or aerosol or powder or inhal\$ or solution or turbuhaler or intranasal\$ or (intra  
10 adj1 nasal) or topical\$ or nose or nostril\$).mp.  
11  
12 37 exp Administration, Topical/  
13  
14 38 exp Administration, Intranasal/  
15  
16 39 or/1-31  
17  
18 40 or/32-35  
19  
20 41 or/36-38  
21  
22 42 39 and 40 and 41  
23  
24 43 randomized controlled trial.pt.  
25  
26 44 controlled clinical trial.pt.  
27  
28 45 randomized.ab.  
29  
30 46 placebo.ab.  
31  
32 47 clinical trials as topic.sh.  
33  
34 48 randomly.ab.  
35  
36 49 trial.ti.  
37  
38 50 43 or 44 or 45 or 46 or 47 or 48 or 49  
39  
40 51 exp animals/ not humans.sh.  
41  
42 52 50 not 51  
43  
44 53 42 and 52

### CENTRAL (CRS Web)

- 1 (azelastin\*):ti,ab,kw OR (azelastine-fluticasone):ti, ab,kw OR (azeflu):ti,ab,kw OR  
2 (mp-azeflu):ti, ab,kw OR (azelastine AND fluticasone):ti,ab,kw  
3 (dymista):ti,ab,kw OR (azecort):ti, ab,kw OR (olopatadin\*):ti,ab, kw OR (olopatadine-  
4 mometasone):ti, ab, kw OR ((olopatadine AND mometasone)):ti,ab,kw  
5 (gsp301):ti,ab,kw OR (ryaltris):ti,ab,kw OR (levocabastin\*):ti,ab,kw OR (lexicomp):ti,  
6 ab, kw OR (ciclesonid\*):ti,ab,kw  
7 (alvesco):ti,ab,kw OR (fluticason\*):ti,ab, kw OR (gw685698x):ti, ab, kw OR  
8 (mometason\*):ti, ab, kw OR (beclometason\*):ti,ab,kw  
9 (budesonid\*):ti,ab,kw OR (triamcinolon\*):ti, ab,kw  
10 MESH DESCRIPTOR: [Olopatadine Hydrochloride] EXPLODE ALL  
11 MESH DESCRIPTOR: [Fluticasone] EXPLODE ALL  
12 MESH DESCRIPTOR: [Mometasone Furoate] EXPLODE ALL  
13 MESH DESCRIPTOR: [Beclomethasone] EXPLODE ALL

- 10 MESH DESCRIPTOR: [Budesonide] EXPLODE ALL
- 11 MESH DESCRIPTOR: [Triamcinolone] EXPLODE ALL
- 12 #1 OR #2 OR #3 OR #4 OR #5 OR #6 OR #7 OR #8 OR #9 OR #10 OR #11
- 13 MESH DESCRIPTOR: [Rhinitis] EXPLODE ALL
- 14 (rhinit\*):ti,ab,kw OR (rhinoconjunctivit\*):ti, ab,kw
- 15 MESH DESCRIPTOR: [Rhinitis, Allergic] EXPLODE ALL
- 16 (hayfever):ti,ab, kw OR ("hay fever"):ti, ab, kw OR (pollenosis):ti,ab,kw OR  
(pollinosis):ti, ab, kw OR ("SAR"):ti,ab,kw
- 17 #13 OR #14 OR # 15 OR #16
- 18 (spray\*):ti,ab,kw OR (aerosol):ti, ab, kw OR (powder):ti,ab,kw OR (inhal\*):ti,ab, kw  
OR (solution):ti,ab,kw
- 19 (turbuhaler):ti, ab,kw OR (intranasal\*):ti,ab,kw OR (nasal):ti, ab,kw OR (topical\*):ti,  
ab,kw OR (nose):ti, ab,kw
- 20 (nostril\*):ti,ab,kw
- 21 MESH DESCRIPTOR: [Administration, Topical] EXPLODE ALL
- 22 MESH DESCRIPTOR: [Administration, Intranasal] EXPLODE ALL
- 23 #18 OR #19 OR #20 OR #21 OR #22
- 24 #12 AND #17 AND #23

### Embase

- 1 (azelastin\$ or azelastine-fluticasone or azeflu or MP-azeflu or (azelastine adj2  
fluticasone) or dymista or azecort or olopatadin\$ or olopatadine-mometasone or  
(olopatadine adj2 mometasone) or gsp301 orryaltris or levocabastin\$ or lexicomp or  
ciclesonid\$ or Alvesco or fluticason\$ or GW685698X or mometason\$ or  
beclometason\$ or budesonid\$ or triamcinolon\$).tw.
- 2 (rhinit\$ or rhinoconjunctivit\$ or hayfever or "hay fever" or pollenosis or pollinosis).tw.
- 3 (((spray\$ or aerosol or powder or inhal\$ or solution or turbuhaler or intranasal\$).tw. or  
intra.mp.) adj1 nasal.tw.) or topical\$.tw. or nose.tw. or nostril\$.tw. or nasal.tw.
- 4 1 and 2 and 3
- 5 randomized controlled trial/  
6 controlled clinical study/  
7 5 or 6
- 8 random\$.ti,ab.
- 9 randomization/  
10 intermethod comparison/  
11 placebo.ti,ab  
12 (compare or compared or comparison).ti.

- 1  
2  
3 13 ((evaluated or evaluate or evaluating or assessed or assess) and (compare or compared  
4 or comparing or comparison)).ab.  
5  
6 14 (open adj label).ti,ab.  
7  
8 15 ((double or single or doubly or singly) adj (blind or blinded or blindly)).ti,ab.  
9  
10 16 double blind procedure/  
11 17 parallel group\$1.ti,ab.  
12  
13 18 (crossover or cross over).ti, ab.  
14 19 ((assign\$ or match or matched or allocation) adj5 (alternate or group\$1 or  
15 intervention\$1 or patient\$1 or subject\$1 or participant\$1)).ti,ab.  
16  
17 20 (assigned or allocated).ti,ab.  
18  
19 21 (controlled adj7 (study or design or trial)).ti,ab.  
20  
21 22 (volunteer or volunteers).ti,ab.  
22  
23 23 human experiment/  
24 24 trial.ti.  
25 25 8 or 9 or 10 or 11 or 12 or 13 or 14 or 15 or 16 or 17 or 18 or 19 or 20 or 21 or 22 or 23  
26 or 24  
27  
28 26 25 not 7  
29  
30 27 (((case adj control\$) and random\$) not randomi?ed controlled).ti,ab.  
31  
32 28 (Systematic review not (trial or study)).ti.  
33  
34 29 (nonrandom\$ not random\$).ti, ab.  
35  
36 30 "Random field\$"ti,ab.  
37  
38 31 (random cluster adj3 sampl\$).ti,ab.  
39  
40 32 (review.ab. and review.pt.) not trial.ti.  
41  
42 33 "we searched".ab. and (review.ti. or review.pt.)  
43  
44 34 "update review".ab.  
45  
46 35 (databases adj4 searched).ab.  
47  
48 36 (rat or rats or mouse or mice or swine or porcine or murine or sheep or lambs or pigs or  
49 piglets or rabbit or rabbits or cat or cats or dog or dogs or cattle or bovine or monkey or  
50 monkeys or trout or  
51 marmoset\$1).ti. and animal experiment/  
52  
53 37 37 Animal experiment/not (human experiment/or human/  
54 or/27-37  
55  
56 39 26 not 38  
57  
58 40 4 and 39  
59  
60



- 1 TS=(azelastin\* OR azelastine-fluticasone OR azeflu OR MP-azeflu OR (azelastine NEAR/2 fluticasone) OR dymista OR azecort OR olopatadin\* OR olopatadine-mometasone OR (olopatadine NEAR/2 mometasone) OR gsp301 OR ryaltris OR levocabastin\* OR lexicomp OR ciclesonid\* OR Alvesco OR fluticason\* OR GW685698X OR mometason\* OR beclometason\* OR budesonid\* OR triamcinolon\*)
- 2 TS=(rhinit\* or rhinoconjunctivit\*) OR TS=(hayfever or "hay fever" or pollenosis or pollinosis or SAR)
- 3 TS=(spray or aerosol or powder or inhal\* or solution or turbuhaler or intranasal\* or (intra NEAR/1 nasal) or topical\* or nose or nostril\*)
- 4 TS=(randomised OR randomized OR randomisation OR randomisation OR placebo\* OR (random\* AND (allocat\* OR assign\*)) OR (blind\* AND (single OR double OR treble OR triple)))
- 5 TS=(animal or animals or pisces or fish or fishes or catfish or catfishes or sheatfish or silurus or arius or heteropneustes or clarias or gariepinus or fathead minnow or fathead minnows or pimephales or promelas or cichlidae or trout or trouts or char or chars or salvelinus or salmo or oncorhynchus or guppy or guppies or millionfish or poecilia or goldfish or goldfishes or carassius or auratus or mullet or mullets or mugil or curema or shark or sharks or cod or cods or gadus or morhua or carp or carps or cyprinus or carpio or killifish or eel or eels or anguilla or zander or sander or lucioperca or stizostedion or turbot or turbots or psetta or flatfish or flatfishes or plaice or pleuronectes or platessa or tilapia or tilapias or oreochromis or sarotherodon or common sole or dover sole or solea or zebrafish or zebrafishes or danio or rerio or seabass or dicentrarchus or labrax or morone or lamprey or lampreys or petromyzon or pumpkinseed or pumpkinseeds or lepomis or gibbosus or herring or clupea or harengus or amphibia or amphibian or amphibians or anura or salientia or frog or frogs or rana or toad or toads or bufo or xenopus or laevis or bombina or epidalea or calamita or salamander or salamanders or newt or newts or triturus or reptilia or reptile or reptiles or bearded dragon or pogona or vitticeps or iguana or iguanas or lizard or lizards or anguis fragilis or turtle or turtles or snakes or snake or aves or bird or birds or quail or quails or coturnix or bobwhite or colinus or virginianus or poultry or poultries or fowl or fowls or chicken or chickens or gallus or zebra finch or taeniopygia or guttata or canary or canaries or serinus or canaria or parakeet or parakeets or grasskeet or parrot or parrots or psittacine or psittacines or shelduck or tadorna or goose or geese or branta or leucopsis or woodlark or lullula or flycatcher or ficedula or hypoleuca or dove or doves or geopelia or cuneata or duck or ducks or greylag or graylag or anser or harrier or circus pygargus or red knot or great knot or calidris or canutus or godwit or limosa

1  
2  
3 or lapponica or meleagris or gallopavo or jackdaw or corvus or monedula or ruff or  
4 philomachus or pugnax or lapwing or peewit or plover or vanellus or swan or cygnus  
5 or columbianus or bewickii or gull or chroicocephalus or ridibundus or albifrons or  
6 great tit or parus or aythya or fuligula or streptopelia or risoria or spoonbill or platalea  
7 or leucorodia or blackbird or turdus or merula or blue tit or cyanistes or pigeon or  
8 pigeons or columba or pintail or anas or starling or sturnus or owl or athene noctua or  
9 pochard or ferina or cockatiel or nymphicus or hollandicus or skylark or alauda or tern  
10 or sterna or teal or crecca or oystercatcher or haematopus or ostralegus or shrew or  
11 shrews or sorex or araneus or crocidura or russula or european mole or talpa or  
12 chiroptera or bat or bats or eptesicus or serotinus or myotis or dasycneme or  
13 daubentonii or pipistrelle or pipistrellus or cat or cats or felis or catus or feline or dog  
14 or dogs or canis or canine or canines or otter or otters or lutra or badger or badgers or  
15 meles or fitchew or fitch or fougart or foulmart or ferrets or ferret or polecat or  
16 polecats or mustela or putorius or weasel or weasels or fox or foxes or vulpes or  
17 common seal or phoca or vitulina or grey seal or halichoerus or horse or horses or  
18 equus or equine or equidae or donkey or donkeys or mule or mules or pig or pigs or  
19 swine or swines or hog or hogs or boar or boars or porcine or piglet or piglets or sus or  
20 scrofa or llama or llamas or lama or glama or deer or deers or cervus or elaphus or cow  
21 or cows or bos taurus or bos indicus or bovine or bull or bulls or cattle or bison or  
22 bisons or sheep or sheeps or ovis aries or ovine or lamb or lambs or mouflon or  
23 mouflons or goat or goats or capra or caprine or chamois or rupicapra or leporidae or  
24 lagomorpha or lagomorph or rabbit or rabbits or oryctolagus or cuniculus or laprine or  
25 hares or lepus or rodentia or rodent or rodents or murinae or mouse or mice or mus or  
26 musculus or murine or woodmouse or apodemus or rat or rats or rattus or norvegicus or  
27 guinea pig or guinea pigs or cavia or porcellus or hamster or hamsters or mesocricetus  
28 or cricetus or cricetus or gerbil or gerbils or jird or jirds or meriones or unguiculatus  
29 or jerboa or jerboas or jaculus or chinchilla or chinchillas or beaver or beavers or castor  
30 fiber or castor canadensis or sciuridae or squirrel or squirrels or sciurus or chipmunk or  
31 chipmunks or marmot or marmots or marmota or suslik or susliks or spermophilus or  
32 cynomys or cottonrat or cottonrats or sigmodon or vole or voles or microtus or myodes  
33 or glareolus or primate or primates or prosimian or prosimians or lemur or lemurs or  
34 lemuriidae or loris or bush baby or bush babies or bushbaby or bushbabies or galago or  
35 galagos or anthropoidea or anthropoids or simian or simians or monkey or monkeys or  
36 marmoset or marmosets or callithrix or cebuella or tamarin or tamarins or saguinus or  
37 leontopithecus or squirrel monkey or squirrel monkeys or saimiri or night monkey or  
38 night monkeys or owl monkey or owl monkeys or douroucoulis or aotus or spider  
39  
40  
41  
42  
43  
44  
45  
46  
47  
48  
49  
50  
51  
52  
53  
54  
55  
56  
57  
58  
59  
60

1  
2  
3 monkey or spider monkeys or ateles or baboon or baboons or papio or rhesus monkey  
4 or macaque or macaca or mulatta or cynomolgus or fascicularis or green monkey or  
5 green monkeys or chlorocebus or vervet or vervets or pygerythrus or hominoidea or  
6 ape or apes or hylobatidae or gibbon or gibbons or siamang or siamangs or nomascus  
7 or symphalangus or hominidae or orangutan or orangutans or pongo or chimpanzee or  
8 chimpanzees or pan troglodytes or bonobo or bonobos or pan paniscus or gorilla or  
9 gorillas or troglodytes)

10  
11  
12  
13  
14 6 #4 NOT #5

15  
16 7 #1 AND #2 AND #3 AND #6  
17

---

18  
19  
20  
21  
22  
23  
24  
25  
26  
27  
28  
29  
30  
31  
32  
33  
34  
35  
36  
37  
38  
39  
40  
41  
42  
43  
44  
45  
46  
47  
48  
49  
50  
51  
52  
53  
54  
55  
56  
57  
58  
59  
60

For peer review only

**PRISMA-P (Preferred Reporting Items for Systematic review and Meta-Analysis Protocols) 2015 checklist: recommended items to address in a systematic review protocol\***

| Section and topic                 | Item No | Checklist item                                                                                                                                                                                                                                         |
|-----------------------------------|---------|--------------------------------------------------------------------------------------------------------------------------------------------------------------------------------------------------------------------------------------------------------|
| <b>ADMINISTRATIVE INFORMATION</b> |         |                                                                                                                                                                                                                                                        |
| Title:                            |         |                                                                                                                                                                                                                                                        |
| Identification                    | 1a      | Identify the report as a protocol of a systematic review - <a href="#">Page 1</a>                                                                                                                                                                      |
| Update                            | 1b      | If the protocol is for an update of a previous systematic review, identify as such - <a href="#">Not applicable</a>                                                                                                                                    |
| Registration                      | 2       | If registered, provide the name of the registry (such as PROSPERO) and registration number - <a href="#">Page 2</a>                                                                                                                                    |
| Authors:                          |         |                                                                                                                                                                                                                                                        |
| Contact                           | 3a      | Provide name, institutional affiliation, e-mail address of all protocol authors; provide physical mailing address of corresponding author - <a href="#">Pages 1-2</a>                                                                                  |
| Contributions                     | 3b      | Describe contributions of protocol authors and identify the guarantor of the review - <a href="#">Page 8</a>                                                                                                                                           |
| Amendments                        | 4       | If the protocol represents an amendment of a previously completed or published protocol, identify as such and list changes; otherwise, state plan for documenting important protocol amendments - <a href="#">Page 2</a>                               |
| Support:                          |         |                                                                                                                                                                                                                                                        |
| Sources                           | 5a      | Indicate sources of financial or other support for the review - <a href="#">Page 8</a>                                                                                                                                                                 |
| Sponsor                           | 5b      | Provide name for the review funder and/or sponsor - <a href="#">Page 8</a>                                                                                                                                                                             |
| Role of sponsor or funder         | 5c      | Describe roles of funder(s), sponsor(s), and/or institution(s), if any, in developing the protocol - <a href="#">Page 8</a>                                                                                                                            |
| <b>INTRODUCTION</b>               |         |                                                                                                                                                                                                                                                        |
| Rationale                         | 6       | Describe the rationale for the review in the context of what is already known - <a href="#">Page 4</a>                                                                                                                                                 |
| Objectives                        | 7       | Provide an explicit statement of the question(s) the review will address with reference to participants, interventions, comparators, and outcomes (PICO) - <a href="#">Page 4</a>                                                                      |
| <b>METHODS</b>                    |         |                                                                                                                                                                                                                                                        |
| Eligibility criteria              | 8       | Specify the study characteristics (such as PICO, study design, setting, time frame) and report characteristics (such as years considered, language, publication status) to be used as criteria for eligibility for the review <a href="#">Page 4-5</a> |
| Information sources               | 9       | Describe all intended information sources (such as electronic databases, contact with study authors, trial registers or other grey literature sources) with planned dates of coverage <a href="#">Page 5</a>                                           |
| Search strategy                   | 10      | Present draft of search strategy to be used for at least one electronic database, including planned limits, such that it could be repeated <a href="#">Supplementary Table 1</a>                                                                       |
| Study records:                    |         |                                                                                                                                                                                                                                                        |
| Data management                   | 11a     | Describe the mechanism(s) that will be used to manage records and data throughout the review <a href="#">Page 5</a>                                                                                                                                    |

|                                    |     |                                                                                                                                                                                                                                                                             |
|------------------------------------|-----|-----------------------------------------------------------------------------------------------------------------------------------------------------------------------------------------------------------------------------------------------------------------------------|
| Selection process                  | 11b | State the process that will be used for selecting studies (such as two independent reviewers) through each phase of the review (that is, screening, eligibility and inclusion in meta-analysis) <a href="#">Page 5</a>                                                      |
| Data collection process            | 11c | Describe planned method of extracting data from reports (such as piloting forms, done independently, in duplicate), any processes for obtaining and confirming data from investigators <a href="#">Page 5-6</a>                                                             |
| Data items                         | 12  | List and define all variables for which data will be sought (such as PICO items, funding sources), any pre-planned data assumptions and simplifications <a href="#">Page 5-6</a>                                                                                            |
| Outcomes and prioritization        | 13  | List and define all outcomes for which data will be sought, including prioritization of main and additional outcomes, with rationale <a href="#">Pages 4-5</a>                                                                                                              |
| Risk of bias in individual studies | 14  | Describe anticipated methods for assessing risk of bias of individual studies, including whether this will be done at the outcome or study level, or both; state how this information will be used in data synthesis - <a href="#">Page 6</a> ; <a href="#">Page 7</a>      |
| Data synthesis                     | 15a | Describe criteria under which study data will be quantitatively synthesised - <a href="#">Page 7</a>                                                                                                                                                                        |
|                                    | 15b | If data are appropriate for quantitative synthesis, describe planned summary measures, methods of handling data and methods of combining data from studies, including any planned exploration of consistency (such as $I^2$ , Kendall's $\tau$ ) - <a href="#">Page 6-7</a> |
|                                    | 15c | Describe any proposed additional analyses (such as sensitivity or subgroup analyses, meta-regression) - <a href="#">Page 7</a>                                                                                                                                              |
|                                    | 15d | If quantitative synthesis is not appropriate, describe the type of summary planned - <a href="#">Not applicable. Quantitative synthesis appropriate</a>                                                                                                                     |
| Meta-bias(es)                      | 16  | Specify any planned assessment of meta-bias(es) (such as publication bias across studies, selective reporting within studies) - <a href="#">Page 6</a>                                                                                                                      |
| Confidence in cumulative evidence  | 17  | Describe how the strength of the body of evidence will be assessed (such as GRADE) - <a href="#">Page 6</a>                                                                                                                                                                 |

**\* It is strongly recommended that this checklist be read in conjunction with the PRISMA-P Explanation and Elaboration (cite when available) for important clarification on the items. Amendments to a review protocol should be tracked and dated. The copyright for PRISMA-P (including checklist) is held by the PRISMA-P Group and is distributed under a Creative Commons Attribution Licence 4.0.**

*From: Shamseer L, Moher D, Clarke M, Ghersi D, Liberati A, Petticrew M, Shekelle P, Stewart L, PRISMA-P Group. Preferred reporting items for systematic review and meta-analysis protocols (PRISMA-P) 2015: elaboration and explanation. BMJ. 2015 Jan 2;349(jan02 1):g7647.*

# BMJ Open

## Intranasal antihistamines and corticosteroids in the treatment of allergic rhinitis: A systematic review and meta-analysis protocol

|                                 |                                                                                                                                                                                                                                                                                                                                                                                                                                                                                                                                                                                                                                                                                                                                                                                                                                                                                                                                                                                                                                                                                                                                                                                                                                                  |
|---------------------------------|--------------------------------------------------------------------------------------------------------------------------------------------------------------------------------------------------------------------------------------------------------------------------------------------------------------------------------------------------------------------------------------------------------------------------------------------------------------------------------------------------------------------------------------------------------------------------------------------------------------------------------------------------------------------------------------------------------------------------------------------------------------------------------------------------------------------------------------------------------------------------------------------------------------------------------------------------------------------------------------------------------------------------------------------------------------------------------------------------------------------------------------------------------------------------------------------------------------------------------------------------|
| Journal:                        | <i>BMJ Open</i>                                                                                                                                                                                                                                                                                                                                                                                                                                                                                                                                                                                                                                                                                                                                                                                                                                                                                                                                                                                                                                                                                                                                                                                                                                  |
| Manuscript ID                   | bmjopen-2023-076614.R1                                                                                                                                                                                                                                                                                                                                                                                                                                                                                                                                                                                                                                                                                                                                                                                                                                                                                                                                                                                                                                                                                                                                                                                                                           |
| Article Type:                   | Protocol                                                                                                                                                                                                                                                                                                                                                                                                                                                                                                                                                                                                                                                                                                                                                                                                                                                                                                                                                                                                                                                                                                                                                                                                                                         |
| Date Submitted by the Author:   | 19-Sep-2023                                                                                                                                                                                                                                                                                                                                                                                                                                                                                                                                                                                                                                                                                                                                                                                                                                                                                                                                                                                                                                                                                                                                                                                                                                      |
| Complete List of Authors:       | Sousa-Pinto, Bernardo; University of Porto, MEDCIDS - Department of Community Medicine<br>Vieira, Rafael José; University of Porto, MEDCIDS - Department of Community Medicine<br>Brozek, Jan; McMaster University, Department of Health Research Methods, Evidence and Impact<br>Cardoso-Fernandes, António; University of Porto, MEDCIDS - Department of Community Medicine<br>Lourenço-Silva, Nuno; University of Porto, MEDCIDS - Department of Community Medicine<br>Ferreira-da-Silva, Renato; University of Porto, MEDCIDS - Department of Community Medicine<br>Ferreira, André; University of Porto; University of Porto, Department of Biomedicine<br>Gil-Mata, Sara; University of Porto<br>Bedbrook, Anna; MASK-air<br>Klimek, L.; Universitätsmedizin der Johannes Gutenberg-Universität Mainz<br>Fonseca, Joao A.; University of Porto<br>Zuberbier, Torsten; Charite Universitätsmedizin Berlin; Fraunhofer-Institut für Translationale Medizin und Pharmakologie ITMP<br>Schünemann, Holger; McMaster University, Department of Health Research Methods, Evidence and Impact<br>Bousquet, J.; Fraunhofer-Institut für Translationale Medizin und Pharmakologie ITMP; Charite Universitätsmedizin Berlin Campus Benjamin Franklin |
| <b>Primary Subject Heading</b>: | Immunology (including allergy)                                                                                                                                                                                                                                                                                                                                                                                                                                                                                                                                                                                                                                                                                                                                                                                                                                                                                                                                                                                                                                                                                                                                                                                                                   |
| Secondary Subject Heading:      | Ear, nose and throat/otolaryngology                                                                                                                                                                                                                                                                                                                                                                                                                                                                                                                                                                                                                                                                                                                                                                                                                                                                                                                                                                                                                                                                                                                                                                                                              |
| Keywords:                       | Immunology < THORACIC MEDICINE, Asthma < THORACIC MEDICINE, Allergy < THORACIC MEDICINE, Chronic airways disease < THORACIC MEDICINE                                                                                                                                                                                                                                                                                                                                                                                                                                                                                                                                                                                                                                                                                                                                                                                                                                                                                                                                                                                                                                                                                                             |
|                                 |                                                                                                                                                                                                                                                                                                                                                                                                                                                                                                                                                                                                                                                                                                                                                                                                                                                                                                                                                                                                                                                                                                                                                                                                                                                  |

1  
2  
3  
4  
5  
6  
7  
8  
9  
10  
11  
12  
13  
14  
15  
16  
17  
18  
19  
20  
21  
22  
23  
24  
25  
26  
27  
28  
29  
30  
31  
32  
33  
34  
35  
36  
37  
38  
39  
40  
41  
42  
43  
44  
45  
46  
47  
48  
49  
50  
51  
52  
53  
54  
55  
56  
57  
58  
59  
60

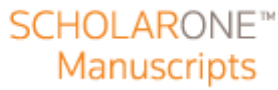

# Intranasal antihistamines and corticosteroids in the treatment of allergic rhinitis: A systematic review and meta-analysis protocol

Bernardo Sousa-Pinto<sup>1,2</sup>, Rafael José Vieira<sup>1,2</sup>, Jan Brozek<sup>3</sup>, António Cardoso-Fernandes<sup>1,2</sup>, Nuno Lourenço Silva<sup>1,2</sup>, Renato Ferreira-da-Silva<sup>1,2</sup>, André Ferreira<sup>2,4,5</sup>, Sara Gil-Mata<sup>6</sup>, Anna Bedbrook<sup>7</sup>, Ludger Klimek<sup>8,9</sup>, João A. Fonseca<sup>1,2</sup>, Torsten Zuberbier<sup>10,11</sup>, Holger J. Schünemann<sup>3</sup>, Jean Bousquet<sup>10-12</sup>

1 – MEDCIDS - Department of Community Medicine, Information and Health Decision Sciences; Faculty of Medicine, University of Porto, Porto, Portugal

2 – CINTESIS@RISE - Health Research Network, MEDCIDS, Faculty of Medicine, University of Porto, Porto, Portugal

3 – Department of Health Research Methods, Evidence, and Impact & Department of Medicine, McMaster University, Hamilton, ON, Canada

4 – Unit of Anatomy, Department of Biomedicine, Faculty of Medicine, University of Porto, Porto, Portugal

5 – Department of Ophthalmology, Centro Hospitalar Universitário do Porto, Porto, Portugal

6 – Faculty of Medicine, University of Porto, Porto, Portugal

7 – MASK-air SAS, Montpellier, France

8 – Department of Otolaryngology, Head and Neck Surgery, Universitätsmedizin Mainz, Mainz, Germany

9 – Center for Rhinology and Allergology, Wiesbaden, Germany

10 – Institute of Allergology, Charité – Universitätsmedizin Berlin, Corporate Member of Freie Universität Berlin and Humboldt-Universität zu Berlin, Berlin, Germany

11 – Fraunhofer Institute for Translational Medicine and Pharmacology ITMP, Allergology and Immunology, Berlin, Germany

12 – ARIA, Montpellier, France

**Corresponding author:** Professor Jean Bousquet, Fraunhofer Institute for Translational Medicine and Pharmacology ITMP, Allergology and Immunology, Berlin, Germany; Telephone: +33 611 42 88 47; Mail: jean.bousquet@orange.fr



1  
2  
3 **Word count:** 1868 words  
4

5 **Amendments:** This protocol does not represent an amendment of a previously completed or published  
6 protocol. Eventual important protocol amendments will be reported in the systematic review.  
7  
8  
9

10  
11  
12  
13  
14  
15  
16  
17  
18  
19  
20  
21  
22  
23  
24  
25  
26  
27  
28  
29  
30  
31  
32  
33  
34  
35  
36  
37  
38  
39  
40  
41  
42  
43  
44  
45  
46  
47  
48  
49  
50  
51  
52  
53  
54  
55  
56  
57  
58  
59  
60

For peer review only

## Abstract

**Introduction:** Intranasal antihistamines and corticosteroids are some of the most frequently used drug classes in the treatment of allergic rhinitis. However, there is uncertainty as to whether effectiveness differences may exist among different intranasal specific medications. This systematic review aims to analyse and synthesise all evidence from randomised controlled trials (RCTs) on the effectiveness of intranasal antihistamines and corticosteroids in rhinitis nasal and ocular symptoms and in rhinoconjunctivitis-related quality-of-life.

**Methods and analysis:** We will search four electronic bibliographic databases and three clinical trials databases for RCTs (i) assessing patients  $\geq 12$  years old with seasonal or perennial allergic rhinitis and (ii) comparing the use of intranasal antihistamines or corticosteroids *versus* placebo. Assessed outcomes will include the Total Nasal Symptom Score (TNSS), the Total Ocular Symptom Score (TOSS) and the Rhinoconjunctivitis Quality-of-Life Questionnaire (RQLQ). We will assess the methodological quality of included primary studies by using the Cochrane risk-of-bias tool. Certainty in the body of evidence for the analysed outcomes will be assessed using the GRADE approach. We will perform a random-effects meta-analysis for each assessed medication and outcome, presenting results as pooled mean differences and standardised mean differences. Heterogeneity will be explored by sensitivity and subgroup analyses, considering (i) the risk of bias, (ii) the follow-up period and (iii) the drug dose.

**Ethics and dissemination:** Ethical considerations will not be required. Results will be disseminated in a peer-review journal.

**PROSPERO registration number:** CRD42023416573.

### Strengths and limitations of this study:

- We will analyse evidence by searching four electronic bibliographic databases and complementing the search with a manual search in three trial databases.
- There will be no language- or publication date-based exclusion criteria.
- We will perform meta-analyses on three relevant outcomes, exploring sources of heterogeneity based on the risk of bias, follow-up period or doses of the drugs.
- We will only include trials assessing patients  $\geq 12$  years old and, therefore, our results may not be generalisable to children.
- We will only consider comparisons against placebo.

## Introduction

Allergic rhinitis is a common chronic condition with a prevalence of up to 50% in some countries.[1] While not being potentially fatal, allergic rhinitis has a relevant impact on work and school productivity, as well as on patients' quality of life.[2-4] Pharmacological interventions for allergic rhinitis have evolved over the past decades, with the current mainstay treatment including oral or intranasal antihistamines, intranasal corticosteroids and fixed combinations of intranasal corticosteroids + antihistamines. In this context, the 2020 Allergic Rhinitis and Its Impact on Asthma (ARIA) guidelines preferentially favour the use of intranasal medication, considering that (i) intranasal corticosteroids or fixed combinations of intranasal corticosteroids + antihistamines display higher effectiveness than oral or intranasal antihistamines and (ii) intranasal treatments display a faster onset of action than oral treatments.[5] However, for most recommendations, the level of evidence was reported to be "low" or "very low".[5] In addition, there is insufficient systematised evidence on the quantitative effectiveness of each specific intranasal medication. While there have been other systematic reviews assessing intranasal medications for allergic rhinitis, they either (i) focused on a single medication,[6, 7] (ii) did not specifically provide data for each medication within the same class,[8, 9] or (iii) displayed a different aim (e.g., Juel-Berg et al. sought to compare intranasal corticosteroids *versus* oral antihistamines).[8]. This prompts the need for a systematic assessment – using a standardised approach – on the effectiveness of each specific intranasal antihistamine or steroid. This is even more relevant given not only the large amount of evidence unpublished in scientific journals but also the fact that randomised controlled trials (RCTs) assessing the effectiveness of intranasal rhinitis medications are quite heterogeneous on their methodological quality and methods for outcome assessment (e.g., scores used to quantify nasal or ocular symptoms).

Therefore, the main aim of this systematic review will be to analyse and synthesise all evidence from randomised controlled trials (RCTs) on the efficacy of intranasal antihistamines and intranasal corticosteroids in rhinitis nasal and ocular symptoms and in rhinoconjunctivitis-related quality-of-life. The obtained results will allow us not only to acquire pooled meta-analytical estimates on the efficacy of each specific drug, but also to assess the certainty in the existing body of evidence.

## Methods and analyses

We will perform a systematic review of RCTs assessing the efficacy of intranasal antihistamines and/or corticosteroids in the treatment of patients with allergic rhinitis. This systematic review will follow the Preferred Reporting Items for Systematic Reviews and Meta-Analyses (PRISMA) guidelines.[10]

## Eligibility criteria

We will include RCTs assessing patients  $\geq 12$  years old with seasonal or perennial allergic rhinitis and comparing the use of intranasal antihistamines or corticosteroids or their combination *versus* placebo

(direct comparisons between active drugs will not be considered) on at least one of the following patient-reported outcome measures (selected as they correspond to the most common efficacy outcomes assessed in rhinitis trials, providing information on different disease domains): Total Nasal Symptom Score (TNSS), Total Ocular Symptom Score (TOSS), Total Symptom Score (TSS), or Rhinoconjunctivitis Quality of Life Questionnaire (RQLQ). We define the TNSS as any score computed based on the sum of several patient-reported scores for individual nasal symptoms. Accordingly, we define the TOSS as any score computed based on the sum of several patient-reported scores for individual ocular symptoms, while the TSS implies the combination of different types of rhinitis symptoms (e.g., nasal, ocular and/or palate symptoms). The TNSS, TOSS and TSS will be assessed in a reflective manner; that is, reflecting the patient's symptoms in the previous 12 or 24 hours. The following intranasal drugs will be considered: azelastine, azelastine-fluticasone, beclomethasone, budesonide, ciclesonide, fluticasone furoate, fluticasone propionate, levocabastine, mometasone furoate, olopatadine, olopatadine-mometasone and triamcinolone. We will only include RCTs with a parallel design, given the difficulties related to cross-over studies associated with the duration of the pollen season (for seasonal allergic rhinitis) and with symptom attenuation (for perennial allergic rhinitis). In addition, considering Food and Drug Administration recommendations,[11] we will only include studies with a follow-up period of (i) at least two weeks, if assessing patients with seasonal allergic rhinitis or (ii) at least four weeks, if assessing those with perennial allergic rhinitis.

We will exclude RCTs assessing patients with seasonal allergic rhinitis that are not conducted during the pollen season or in which treatment started before the beginning of the pollen season. No exclusion criteria will be applied based on the publication language, date or status.

### **Information sources and search strategy**

We will search MEDLINE (via Ovid), Web of Science, Embase and CENTRAL (Cochrane Central Register of Controlled Trials) from database inception up to August 2022 (with a search update being performed in September 2023). In addition, we will manually search the clinicaltrials.gov, the GSK clinical study dataset and the AstraZeneca Clinical Trials Website in order to identify potentially unpublished trials. Search queries to be applied are listed in the Supplementary Table 1.

### **Study selection and data collection**

After duplicates removal, each record will be independently assessed by two authors, first by title and abstract screening and subsequently by full-text reading. For each included record, we will assess whether additional publications from the same study are available (in order to avoid duplication of information from the same participants). Two reviewers will independently extract data from each included primary study using a purpose-built online form (a pilot version of the form will be initially developed, with the definitive version being made available after the assessment of the first three RCTs).

1  
2  
3 From each study, we will retrieve information on (i) the assessed disease (seasonal *versus* perennial  
4 allergic rhinitis), (ii) the participants' inclusion and exclusion criteria (as stated in each study  
5 description), (iii) the data collection period, (iv) the places where patients were recruited, (v) the active  
6 treatment daily dose, (vi) the follow-up period, (vii) the number of randomised participants (as well as  
7 their age and gender distribution) and (viii) the number of participants completing the trial (despite the  
8 fact that, for each outcome, we will assess the effects among all patients who had the outcome  
9 measured). We will also extract the information required to assess the risk of bias in each study. In  
10 addition, for each reported outcome (TNSS, TOSS, TSS and/or RQLQ), we will retrieve information  
11 on the scale and computation method, baseline values and post-intervention and/or change from  
12 baseline values, when available. If results are only provided in graphs, estimates will be obtained using  
13 the PlotDigitizer tool (<https://plotdigitizer.com/>).

14  
15  
16 Disagreements between reviewers in data selection or extraction will be solved by consensus or by a  
17 third reviewer. Authors of the included primary studies will be contacted to provide missing  
18 information.

### 19 20 21 **Risk of bias and certainty assessment**

22  
23 The risk of bias of each included primary study will be independently assessed by two researchers using  
24 the Cochrane Risk of Bias tool. For the "blinding of outcome assessment" and "incomplete outcome  
25 data" items, assessments will be performed separately for each reported outcome. The risk of selective  
26 reporting will be assessed not only by reading the study's methods, but also by analysing the trial  
27 protocol or registration if available. Disagreements between reviewers will be solved by consensus or  
28 by a third reviewer.

29  
30 Certainty in the body of evidence for each outcome and across outcomes will be assessed using the  
31 GRADE approach.[12] In order to assess whether a strong association is obtained, we will verify if (i)  
32 the meta-analytical point estimate for each outcome is higher than the minimal important difference,  
33 and also (ii) if this value is not contained in the respective confidence interval. For RQLQ, on a 0-6  
34 scale, we will consider a minimal important difference of 0.5.[13] For the TNSS, on a 0-12 scale, we  
35 will consider a minimal important difference of 0.28 (following the work of Barnes et al.[14]). For the  
36 assessment of the possibility of publication biases, we will consider whether (i) small and large studies  
37 converge on the same effect estimates, (ii) there has been an earlier publication of positive results and  
38 (iii) there is information on registered RCTs without published results.

### 39 40 41 **Quantitative synthesis of results**

42  
43 All assessed outcomes are continuous. Therefore, for each group in each primary study, we will present  
44 the mean ( $\pm$  standard-deviation) baseline and change-from-baseline value for all outcomes of interest.  
45 Any missing information on spread measures (standard-deviation, standard-error or variance) will be  
46  
47  
48  
49  
50  
51  
52  
53  
54  
55  
56  
57  
58  
59  
60

1  
2  
3 estimated using the algorithm suggested by Weir et al.,[15] (itself an adaptation of that proposed by  
4 Weibe et al.[16]) and in accordance with Cochrane recommendations.[17] In summary, we will attempt  
5 to apply one of the following methods in the following hierarchical order: (i) use of algebraic  
6 recalculation to recover missing data, (ii) contacting of study authors to retrieve missing data, (iii) use  
7 of approximate algebraic calculations based on other study-level measures (e.g., range or quartiles), (iv)  
8 use of multiple imputation methods, (v) use of non-parametric summaries, (vi) use of single-imputation  
9 methods, (vii) summary of non-pooled data alongside meta-analysed results in the systematic review  
10 text (Figure 1). As recommended by the Cochrane handbook, (i) the obtention of missing data based on  
11 the methods iii-vii will only happen if missing data occurs in a small proportion of studies and (ii)  
12 sensitivity analyses will always be performed to assess the impact of dealing with missing data.[17]  
13

14  
15 We will perform random-effects meta-analyses of mean differences (MD; if scores are measured using  
16 the same scale) or of standardised mean differences (SMD; if scores are measured using different scales)  
17 in change-from-baseline values (active treatment *versus* placebo). For outcomes calculated based on  
18 the same symptoms and giving the same weight to each symptom but with results presented in different  
19 scales (e.g., two studies calculating the TNSS based on the same symptoms, but with one presenting  
20 the results on a scale of 0-12 and another on a scale of 0-24), scales will be reconverted into a scale of  
21 0-12 for the TNSS and 0-9 for the TOSS. Separate meta-analyses will be performed for patients with  
22 seasonal and perennial allergic rhinitis.  
23

24  
25 The restricted maximum likelihood approach will be used to estimate between-study variance.  
26 Heterogeneity will be assessed by estimating the *p*-value of the Q-Cochran test and by the *I*<sup>2</sup> statistic.  
27 Irrespective of the amount of detected heterogeneity, sensitivity analyses will be performed (i)  
28 excluding studies with a high risk of bias, (ii) excluding studies in which algebraic calculations needed  
29 to be performed to estimate missing data, (iii) based on the follow-up period of the study and (iv) based  
30 on the doses of the drugs being assessed. In the presence of substantial heterogeneity, leave-one-out  
31 sensitivity analyses will also be performed.  
32

33 All analyses will be performed using software R, with the use of the metafor and meta packages.  
34

### 35 **Patient and Public Involvement statement**

36 There will be no Patient or Public Involvement in this study.  
37

### 38 **Ethics and dissemination**

39 Ethical considerations will not be required. Results will be disseminated in a peer-review journal. Data  
40 can be made available by the corresponding author upon reasonable request.  
41  
42  
43  
44  
45  
46  
47  
48  
49  
50  
51  
52  
53  
54  
55  
56  
57  
58  
59  
60

## Discussion

This systematic review and meta-analysis will be a first step to assessing the efficacy of specific intranasal antihistamines and corticosteroids in the treatment of allergic rhinitis. While there will be some limitations in terms of generalisability (e.g., as only RCTs with adults and adolescents will be included) or related to the fact that only comparisons against placebo will be considered, these limitations may be overcome by future complementary studies (e.g., a systematic review of RCTs in paediatric patients or a network meta-analysis on intranasal treatments for allergic rhinitis).

Our study will synthesise data from RCTs to determine the impact of intranasal antihistamines and corticosteroids on nasal symptoms, on ocular symptoms and on the quality of life of patients with allergic rhinitis. In addition, it will enable us to assess the methodological quality and certainty in the body of existing evidence, allowing us to make robust conclusions on the efficacy of these treatments. The findings of this systematic review may support recommendations in future guidelines on allergic rhinitis treatment, as well as lay the basis for a future network meta-analysis, taking into account both direct and indirect comparisons between specific drugs.

**Authors' contributions:** BSP, RJV, JAF and JB participated in the study design and in the drafting of the protocol manuscript. JB, ACF, NLS, RFS, AF, SGM, AB, LK, TZ and HJS participated in the study design and in the critical revision of the manuscript. JB is the guarantor of the review.

**Funding statement:** The work of this study has been funded within the context of the Allergic Rhinitis and its Impact on Asthma (ARIA) group.

### Competing interest statement:

L. Klimek reports grants from Allergopharma, MEDA/Mylan, ALK Abelló, LETI Pharma, Stallergenes, Sanofi, ASIT biotech, Lofarma Quintiles, AstraZeneca, GSK, and Immunotk; and personal fees from Allergopharma, MEDA/Mylan, HAL Allergie, LETI Pharma, Sanofi, Allergy Therapeut, and Cassella Med, outside the submitted work.

J. A Fonseca reports grants from Astrazeneca and Mundipharma; and personal fees from AstraZeneca, Mundipharma, Sanofi, GSK, and Teva, outside the submitted work.

T. Zuberbier reports grants from Novartis and Henkel; personal fees from Bayer Health Care, FAES, Novartis, Henkel, AstraZeneca, AbbVie, ALK, Almirall, Astellas, Bencard, Berlin Chemie, HAL, Leti, Meda, Menarini, Merck, MSD, Pfizer, Sanofi, Stallergenes, Takeda, Teva, UCB, Kryolan, and L'Oréal, outside the submitted work.

J. Bousquet reports personal fees from Chiesi, Cipla, Hikma, Menarini, Mundipharma, Mylan, Novartis, Purina, Sanofi-Aventis, Takeda, Teva, and Uriach; and other from Kyomed-Innov, outside the submitted work.



## References

1. Bousquet J, Anto JM, Bachert C, et al. Allergic rhinitis. *Nat Rev Dis Primers*. Dec 3 2020;6(1):95. doi:10.1038/s41572-020-00227-0
2. Thompson AK, Juniper E, Meltzer EO. Quality of life in patients with allergic rhinitis. *Ann Allergy Asthma Immunol*. Nov 2000;85(5):338-47; quiz 347-8. doi:10.1016/S1081-1206(10)62543-4
3. Vandenplas O, Vinnikov D, Blanc PD, et al. Impact of Rhinitis on Work Productivity: A Systematic Review. *J Allergy Clin Immunol Pract*. Jul-Aug 2018;6(4):1274-1286 e9. doi:10.1016/j.jaip.2017.09.002
4. Vieira RJ, Pham-Thi N, Anto JM, et al. Academic Productivity of Young People With Allergic Rhinitis: A MASK-air Study. *J Allergy Clin Immunol Pract*. Nov 2022;10(11):3008-3017 e4. doi:10.1016/j.jaip.2022.08.015
5. Bousquet J, Schunemann HJ, Togias A, et al. Next-generation Allergic Rhinitis and Its Impact on Asthma (ARIA) guidelines for allergic rhinitis based on Grading of Recommendations Assessment, Development and Evaluation (GRADE) and real-world evidence. *J Allergy Clin Immunol*. Jan 2020;145(1):70-80 e3. doi:10.1016/j.jaci.2019.06.049
6. Debbaneh PM, Bareiss AK, Wise SK, McCoul ED. Intranasal Azelastine and Fluticasone as Combination Therapy for Allergic Rhinitis: Systematic Review and Meta-analysis. *Otolaryngol Head Neck Surg*. Sep 2019;161(3):412-418. doi:10.1177/0194599819841883
7. Rodrigo GJ, Neffen H. Efficacy of fluticasone furoate nasal spray vs. placebo for the treatment of ocular and nasal symptoms of allergic rhinitis: a systematic review. *Clin Exp Allergy*. Feb 2011;41(2):160-70. doi:10.1111/j.1365-2222.2010.03654.x
8. Juel-Berg N, Darling P, Bolvig J, et al. Intranasal corticosteroids compared with oral antihistamines in allergic rhinitis: A systematic review and meta-analysis. *Am J Rhinol Allergy*. Jan 9 2017;31(1):19-28. doi:10.2500/ajra.2016.30.4397
9. Chitsuthipakorn W, Hoang MP, Kanjanawasee D, Seresirikachorn K, Snidvongs K. Combined medical therapy in the treatment of allergic rhinitis: Systematic review and meta-analyses. *Int Forum Allergy Rhinol*. Dec 2022;12(12):1480-1502. doi:10.1002/alr.23015
10. Page MJ, McKenzie JE, Bossuyt PM, et al. The PRISMA 2020 statement: an updated guideline for reporting systematic reviews. *BMJ*. Mar 29 2021;372:n71. doi:10.1136/bmj.n71
11. Administration FaD. *Allergic Rhinitis: Developing Drug Products for Treatment - Guidance for Industry*. 2018. <https://www.fda.gov/files/drugs/published/Allergic-Rhinitis--Developing-Drug-Products-for-Treatment-Guidance-for-Industry.pdf>
12. Brozek JL, Akl EA, Alonso-Coello P, et al. Grading quality of evidence and strength of recommendations in clinical practice guidelines. Part 1 of 3. An overview of the GRADE approach and grading quality of evidence about interventions. *Allergy*. May 2009;64(5):669-77. doi:10.1111/j.1398-9995.2009.01973.x
13. Juniper EF, Guyatt GH, Griffith LE, Ferrie PJ. Interpretation of rhinoconjunctivitis quality of life questionnaire data. *J Allergy Clin Immunol*. Oct 1996;98(4):843-5. doi:10.1016/s0091-6749(96)70135-5
14. Barnes ML, Vaidyanathan S, Williamson PA, Lipworth BJ. The minimal clinically important difference in allergic rhinitis. *Clin Exp Allergy*. Feb 2010;40(2):242-50. doi:10.1111/j.1365-2222.2009.03381.x
15. Weir CJ, Butcher I, Assi V, et al. Dealing with missing standard deviation and mean values in meta-analysis of continuous outcomes: a systematic review. *BMC Med Res Methodol*. Mar 7 2018;18(1):25. doi:10.1186/s12874-018-0483-0
16. Wiebe N, Vandermeer B, Platt RW, Klassen TP, Moher D, Barrowman NJ. A systematic review identifies a lack of standardization in methods for handling missing variance data. *J Clin Epidemiol*. Apr 2006;59(4):342-53. doi:10.1016/j.jclinepi.2005.08.017
17. Higgins JP, Thomas J, Chandler J, et al. *Cochrane handbook for systematic reviews of interventions*. John Wiley & Sons; 2019.



1  
2  
3  
4  
5  
6  
7  
8  
9  
10  
11  
12  
13  
14  
15  
16  
17  
18  
19  
20  
21  
22  
23  
24  
25  
26  
27  
28  
29  
30  
31  
32  
33  
34  
35  
36  
37  
38  
39  
40  
41  
42  
43  
44  
45  
46  
47  
48  
49  
50  
51  
52  
53  
54  
55  
56  
57  
58  
59  
60

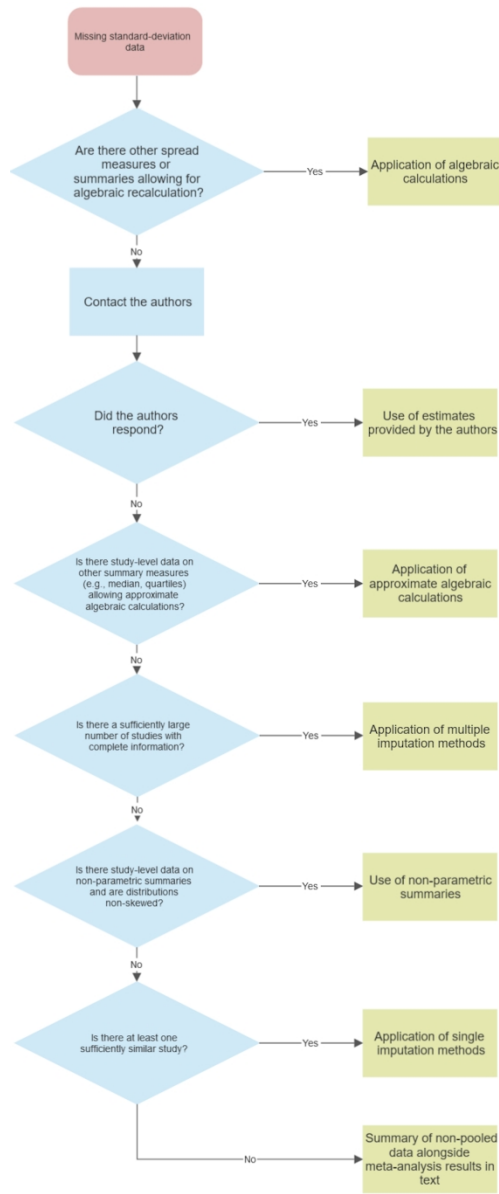

228x543mm (300 x 300 DPI)

**Supplementary Table 1. Queries applied in the different bibliographic databases****MEDLINE (Ovid)**

- 1 azelastin\$.mp.
- 2 azelastine-fluticasone.mp.
- 3 azeflu.mp.
- 4 MP-azeflu.mp.
- 5 (azelastine adj2 fluticasone).mp.
- 6 dymista.mp.
- 7 azecort.mp.
- 8 olopatadin\$.mp.
- 9 olopatadine-mometasone.mp.
- 10 (olopatadine adj2 mometasone).mp.
- 11 gsp301.mp.
- 12 ryaltris.mp.
- 13 levocabastin\$.mp.
- 14 lexicomp.mp.
- 15 ciclesonid\$.mp.
- 16 Alvesco.mp.
- 17 fluticason\$.mp.
- 18 GW685698X.mp.
- 19 mometason\$.mp.
- 20 beclometason\$.mp.
- 21 budesonid\$.mp.
- 22 triamcinolon\$.mp.
- 23 azelastine.nm.
- 24 levocabastine.nm.
- 25 ciclesonide.nm.
- 26 exp Olopatadine Hydrochloride/
- 27 exp Fluticasone/
- 28 exp Mometasone Furoate/
- 29 exp Beclomethasone/
- 30 exp Budesonide/
- 31 exp Triamcinolone/
- 32 exp Rhinitis/
- 33 (rhinit\$ or rhinoconjunctivit\$).mp.
- 34 exp Allergic Rhinitis/

- 1  
2  
3 35 (hayfever or "hay fever" or pollenosis or pollinosis or SAR).mp.  
4  
5 36 (spray or aerosol or powder or inhal\$ or solution or turbuhaler or intranasal\$ or (intra  
6  
7 adj1 nasal) or topical\$ or nose or nostril\$).mp.  
8 37 exp Administration, Topical/  
9 38 exp Administration, Intranasal/  
10  
11 39 or/1-31  
12  
13 40 or/32-35  
14  
15 41 or/36-38  
16  
17 42 39 and 40 and 41  
18 43 randomized controlled trial.pt.  
19 44 controlled clinical trial.pt.  
20 45 randomized.ab.  
21 46 placebo.ab.  
22 47 clinical trials as topic.sh.  
23 48 randomly.ab.  
24 49 trial.ti.  
25 50 43 or 44 or 45 or 46 or 47 or 48 or 49  
26 51 exp animals/ not humans.sh.  
27 52 50 not 51  
28 53 42 and 52

### CENTRAL (CRS Web)

- 1 (azelastin\*):ti,ab,kw OR (azelastine-fluticasone):ti, ab,kw OR (azeflu):ti,ab,kw OR  
2 (mp-azeflu):ti, ab,kw OR (azelastine AND fluticasone):ti,ab,kw  
3 (dymista):ti,ab,kw OR (azecort):ti, ab,kw OR (olopatadin\*):ti,ab, kw OR (olopatadine-  
4 mometasone):ti, ab, kw OR ((olopatadine AND mometasone)):ti,ab,kw  
5 (gsp301):ti,ab,kw OR (ryaltris):ti,ab,kw OR (levocabastin\*):ti,ab,kw OR (lexicomp):ti,  
6 ab, kw OR (ciclesonid\*):ti,ab,kw  
7 (alvesco):ti,ab,kw OR (fluticason\*):ti,ab, kw OR (gw685698x):ti, ab, kw OR  
8 (mometason\*):ti, ab, kw OR (beclometason\*):ti,ab,kw  
9 (budesonid\*):ti,ab,kw OR (triamcinolon\*):ti, ab,kw  
10 MESH DESCRIPTOR: [Olopatadine Hydrochloride] EXPLODE ALL  
11 MESH DESCRIPTOR: [Fluticasone] EXPLODE ALL  
MESH DESCRIPTOR: [Mometasone Furoate] EXPLODE ALL  
MESH DESCRIPTOR: [Beclomethasone] EXPLODE ALL  
MESH DESCRIPTOR: [Budesonide] EXPLODE ALL  
MESH DESCRIPTOR: [Triamcinolone] EXPLODE ALL

- 1  
2  
3 #1 OR #2 OR #3 OR #4 OR #5 OR #6 OR #7 OR #8 OR #9 OR #10 OR #11  
4  
5 13 MESH DESCRIPTOR: [Rhinitis] EXPLODE ALL  
6  
7 14 (rhinit\*):ti,ab,kw OR (rhinoconjunctivit\*):ti, ab,kw  
8  
9 15 MESH DESCRIPTOR: [Rhinitis, Allergic] EXPLODE ALL  
10  
11 16 (hayfever):ti,ab, kw OR ("hay fever"):ti, ab, kw OR (pollenosis):ti,ab,kw OR  
12 (pollinosis):ti, ab, kw OR ("SAR"):ti,ab,kw  
13  
14 17 #13 OR #14 OR # 15 OR #16  
15  
16 18 (spray\*):ti,ab,kw OR (aerosol):ti, ab, kw OR (powder):ti,ab,kw OR (inhal\*):ti,ab, kw  
17 OR (solution):ti,ab,kw  
18  
19 19 (turbuhaler):ti, ab,kw OR (intranasal\*):ti,ab,kw OR (nasal):ti, ab,kw OR (topical\*):ti,  
20 ab,kw OR (nose):ti, ab,kw  
21  
22 20 (nostril\*):ti,ab,kw  
23  
24 21 MESH DESCRIPTOR: [Administration, Topical] EXPLODE ALL  
25  
26 22 MESH DESCRIPTOR: [Administration, Intranasal] EXPLODE ALL  
27  
28 23 #18 OR #19 OR #20 OR #21 OR #22  
29  
30 24 #12 AND #17 AND #23

### Embase

- 31 1 (azelastin\$ or azelastine-fluticasone or azeflu or MP-azeflu or (azelastine adj2  
32 fluticasone) or dymista or azecort or olopatadin\$ or olopatadine-mometasone or  
33 (olopatadine adj2 mometasone) or gsp301 orryaltris or levocabastin\$ or lexicomp or  
34 ciclesonid\$ or Alvesco or fluticason\$ or GW685698X or mometason\$ or  
35 beclometason\$ or budesonid\$ or triamcinolon\$).tw.  
36  
37 2 (rhinit\$ or rhinoconjunctivit\$ or hayfever or "hay fever" or pollenosis or pollinosis).tw.  
38  
39 3 (((spray\$ or aerosol or powder or inhal\$ or solution or turbuhaler or intranasal\$).tw. or  
40 intra.mp.) adj1 nasal.tw.) or topical\$.tw. or nose.tw. or nostril\$.tw. or nasal.tw.  
41  
42 4 1 and 2 and 3  
43  
44 5 randomized controlled trial/  
45  
46 6 controlled clinical study/  
47  
48 7 5 or 6  
49  
50 8 random\$.ti,ab.  
51  
52 9 randomization/  
53  
54 10 intermethod comparison/  
55  
56 11 placebo.ti,ab  
57  
58 12 (compare or compared or comparison).ti.  
59  
60 13 ((evaluated or evaluate or evaluating or assessed or assess) and (compare or compared  
or comparing or comparison)).ab.

- 1  
2  
3 14 (open adj label).ti,ab.  
4  
5 15 ((double or single or doubly or singly) adj (blind or blinded or blindly)).ti,ab.  
6  
7 16 double blind procedure/  
8  
9 17 parallel group\$1.ti,ab.  
10  
11 18 (crossover or cross over).ti, ab.  
12  
13 19 ((assign\$ or match or matched or allocation) adj5 (alternate or group\$1 or  
14 intervention\$1 or patient\$1 or subject\$1 or participant\$1)).ti,ab.  
15  
16 20 (assigned or allocated).ti,ab.  
17  
18 21 (controlled adj7 (study or design or trial)).ti,ab.  
19  
20 22 (volunteer or volunteers).ti,ab.  
21  
22 23 human experiment/  
23  
24 24 trial.ti.  
25  
26 25 8 or 9 or 10 or 11 or 12 or 13 or 14 or 15 or 16 or 17 or 18 or 19 or 20 or 21 or 22 or 23  
27 or 24  
28  
29 26 25 not 7  
30  
31 27 (((case adj control\$) and random\$) not randomi?ed controlled).ti,ab.  
32  
33 28 (Systematic review not (trial or study)).ti.  
34  
35 29 (nonrandom\$ not random\$).ti, ab.  
36  
37 30 "Random field\$"ti,ab.  
38  
39 31 (random cluster adj3 sampl\$).ti,ab.  
40  
41 32 (review.ab. and review.pt.) not trial.ti.  
42  
43 33 "we searched".ab. and (review.ti. or review.pt.)  
44  
45 34 "update review".ab.  
46  
47 35 (databases adj4 searched).ab.  
48  
49 36 (rat or rats or mouse or mice or swine or porcine or murine or sheep or lambs or pigs or  
50 piglets or rabbit or rabbits or cat or cats or dog or dogs or cattle or bovine or monkey or  
51 monkeys or trout or  
52 marmoset\$1).ti. and animal experiment/  
53  
54 37 37 Animal experiment/not (human experiment/or human/  
55 or/27-37  
56  
57 39 26 not 38  
58  
59 40 4 and 39  
60

### Web of Science

- 1 TS=(azelastin\* OR azelastine-fluticasone OR azeflu OR MP-azeflu OR (azelastine  
NEAR/2 fluticasone) OR dymista OR azecort OR olopatadin\* OR olopatadine-  
mometasone OR (olopatadine NEAR/2 mometasone) OR gsp301 OR ryaltris OR

- 1  
2  
3 levocabastin\* OR lexicomp OR ciclesonid\* OR Alvesco OR fluticason\* OR  
4 GW685698X OR mometason\* OR beclometason\* OR budesonid\* OR triamcinolon\*)  
5  
6 2 TS=(rhinit\* or rhinoconjunctivit\*) OR TS=(hayfever or "hay fever" or pollenosis or  
7 pollinosis or SAR)  
8  
9 3 TS=(spray or aerosol or powder or inhal\* or solution or turbuhaler or intranasal\* or  
10 (intra NEAR/1 nasal) or topical\* or nose or nostril\*)  
11  
12 4 TS=(randomised OR randomized OR randomisation OR randomisation OR placebo\*  
13 OR (random\* AND (allocat\* OR assign\*)) OR (blind\* AND (single OR double OR  
14 treble OR triple)))  
15  
16 5 TS=(animal or animals or pisces or fish or fishes or catfish or catfishes or sheatfish or  
17 silurus or arius or heteropneustes or clarias or gariepinus or fathead minnow or fathead  
18 minnows or pimephales or promelas or cichlidae or trout or trouts or char or chars or  
19 salvelinus or salmo or oncorhynchus or guppy or guppies or millionfish or poecilia or  
20 goldfish or goldfishes or carassius or auratus or mullet or mullets or mugil or curema or  
21 shark or sharks or cod or cods or gadus or morhua or carp or carps or cyprinus or  
22 carpio or killifish or eel or eels or anguilla or zander or sander or lucioperca or  
23 stizostedion or turbot or turbots or psetta or flatfish or flatfishes or plaice or  
24 pleuronectes or platessa or tilapia or tilapias or oreochromis or sarotherodon or  
25 common sole or dover sole or solea or zebrafish or zebrafishes or danio or rerio or  
26 seabass or dicentrarchus or labrax or morone or lamprey or lampreys or petromyzon or  
27 pumpkinseed or pumpkinseeds or lepomis or gibbosus or herring or clupea or harengus  
28 or amphibia or amphibian or amphibians or anura or salientia or frog or frogs or rana or  
29 toad or toads or bufo or xenopus or laevis or bombina or epidalea or calamita or  
30 salamander or salamanders or newt or newts or triturus or reptilia or reptile or reptiles  
31 or bearded dragon or pogona or vitticeps or iguana or iguanas or lizard or lizards or  
32 anguis fragilis or turtle or turtles or snakes or snake or aves or bird or birds or quail or  
33 quails or coturnix or bobwhite or colinus or virginianus or poultry or poultries or fowl  
34 or fowls or chicken or chickens or gallus or zebra finch or taeniopygia or guttata or  
35 canary or canaries or serinus or canaria or parakeet or parakeets or grasskeet or parrot  
36 or parrots or psittacine or psittacines or shelduck or tadorna or goose or geese or branta  
37 or leucopsis or woodlark or lullula or flycatcher or ficedula or hypoleuca or dove or  
38 doves or geopelia or cuneata or duck or ducks or greylag or graylag or anser or harrier  
39 or circus pygargus or red knot or great knot or calidris or canutus or godwit or limosa  
40 or lapponica or meleagris or gallopavo or jackdaw or corvus or monedula or ruff or  
41 philomachus or pugnax or lapwing or peewit or plover or vanellus or swan or cygnus  
42 or columbianus or bewickii or gull or chroicocephalus or ridibundus or albifrons or  
43  
44  
45  
46  
47  
48  
49  
50  
51  
52  
53  
54  
55  
56  
57  
58  
59  
60

1  
2  
3 great tit or parus or aythya or fuligula or streptopelia or risoria or spoonbill or platalea  
4 or leucorodia or blackbird or turdus or merula or blue tit or cyanistes or pigeon or  
5 pigeons or columba or pintail or anas or starling or sturnus or owl or athene noctua or  
6 pochard or ferina or cockatiel or nymphicus or hollandicus or skylark or alauda or tern  
7 or sterna or teal or crecca or oystercatcher or haematopus or ostralegus or shrew or  
8 shrews or sores or araneus or crocidura or russula or european mole or talpa or  
9 chiroptera or bat or bats or eptesicus or serotinus or myotis or dasycneme or  
10 daubentonii or pipistrelle or pipistrellus or cat or cats or felis or catus or feline or dog  
11 or dogs or canis or canine or canines or otter or otters or lutra or badger or badgers or  
12 meles or fitchew or fitch or foomart or foulmart or ferrets or ferret or polecat or  
13 polecats or mustela or putorius or weasel or weasels or fox or foxes or vulpes or  
14 common seal or phoca or vitulina or grey seal or halichoerus or horse or horses or  
15 equus or equine or equidae or donkey or donkeys or mule or mules or pig or pigs or  
16 swine or swines or hog or hogs or boar or boars or porcine or piglet or piglets or sus or  
17 scrofa or llama or llamas or lama or glama or deer or deers or cervus or elaphus or cow  
18 or cows or bos taurus or bos indicus or bovine or bull or bulls or cattle or bison or  
19 bisons or sheep or sheeps or ovis aries or ovine or lamb or lambs or mouflon or  
20 mouflons or goat or goats or capra or caprine or chamois or rupicapra or leporidae or  
21 lagomorpha or lagomorph or rabbit or rabbits or oryctolagus or cuniculus or laprine or  
22 hares or lepus or rodentia or rodent or rodents or murinae or mouse or mice or mus or  
23 musculus or murine or woodmouse or apodemus or rat or rats or rattus or norvegicus or  
24 guinea pig or guinea pigs or cavia or porcellus or hamster or hamsters or mesocricetus  
25 or cricetus or cricetus or gerbil or gerbils or jird or jirds or meriones or unguiculatus  
26 or jerboa or jerboas or jaculus or chinchilla or chinchillas or beaver or beavers or castor  
27 fiber or castor canadensis or sciuridae or squirrel or squirrels or sciurus or chipmunk or  
28 chipmunks or marmot or marmots or marmota or suslik or susliks or spermophilus or  
29 cynomys or cottonrat or cottonrats or sigmodon or vole or voles or microtus or myodes  
30 or glareolus or primate or primates or prosimian or prosimians or lemur or lemurs or  
31 lemuridae or loris or bush baby or bush babies or bushbaby or bushbabies or galago or  
32 galagos or anthropoidea or anthropoids or simian or simians or monkey or monkeys or  
33 marmoset or marmosets or callithrix or cebuella or tamarin or tamarins or saguinus or  
34 leontopithecus or squirrel monkey or squirrel monkeys or saimiri or night monkey or  
35 night monkeys or owl monkey or owl monkeys or douroucoulis or aotus or spider  
36 monkey or spider monkeys or ateles or baboon or baboons or papio or rhesus monkey  
37 or macaque or macaca or mulatta or cynomolgus or fascicularis or green monkey or  
38 green monkeys or chlorocebus or vervet or vervets or pygerythrus or hominoidea or  
39  
40  
41  
42  
43  
44  
45  
46  
47  
48  
49  
50  
51  
52  
53  
54  
55  
56  
57  
58  
59  
60

1  
2  
3 ape or apes or hylobatidae or gibbon or gibbons or siamang or siamangs or nomascus  
4 or symphalangus or hominidae or orangutan or orangutans or pongo or chimpanzee or  
5 chimpanzees or pan troglodytes or bonobo or bonobos or pan paniscus or gorilla or  
6 gorillas or troglodytes)

7  
8  
9  
10 6 #4 NOT #5

11 7 #1 AND #2 AND #3 AND #6  
12  
13  
14  
15  
16  
17  
18  
19  
20  
21  
22  
23  
24  
25  
26  
27  
28  
29  
30  
31  
32  
33  
34  
35  
36  
37  
38  
39  
40  
41  
42  
43  
44  
45  
46  
47  
48  
49  
50  
51  
52  
53  
54  
55  
56  
57  
58  
59  
60

---



**PRISMA-P (Preferred Reporting Items for Systematic review and Meta-Analysis Protocols) 2015 checklist: recommended items to address in a systematic review protocol\***

| Section and topic                 | Item No | Checklist item                                                                                                                                                                                                                                         |
|-----------------------------------|---------|--------------------------------------------------------------------------------------------------------------------------------------------------------------------------------------------------------------------------------------------------------|
| <b>ADMINISTRATIVE INFORMATION</b> |         |                                                                                                                                                                                                                                                        |
| Title:                            |         |                                                                                                                                                                                                                                                        |
| Identification                    | 1a      | Identify the report as a protocol of a systematic review - <a href="#">Page 1</a>                                                                                                                                                                      |
| Update                            | 1b      | If the protocol is for an update of a previous systematic review, identify as such - <a href="#">Not applicable</a>                                                                                                                                    |
| Registration                      | 2       | If registered, provide the name of the registry (such as PROSPERO) and registration number - <a href="#">Page 2</a>                                                                                                                                    |
| Authors:                          |         |                                                                                                                                                                                                                                                        |
| Contact                           | 3a      | Provide name, institutional affiliation, e-mail address of all protocol authors; provide physical mailing address of corresponding author - <a href="#">Pages 1-2</a>                                                                                  |
| Contributions                     | 3b      | Describe contributions of protocol authors and identify the guarantor of the review - <a href="#">Page 8</a>                                                                                                                                           |
| Amendments                        | 4       | If the protocol represents an amendment of a previously completed or published protocol, identify as such and list changes; otherwise, state plan for documenting important protocol amendments - <a href="#">Page 2</a>                               |
| Support:                          |         |                                                                                                                                                                                                                                                        |
| Sources                           | 5a      | Indicate sources of financial or other support for the review - <a href="#">Page 8</a>                                                                                                                                                                 |
| Sponsor                           | 5b      | Provide name for the review funder and/or sponsor - <a href="#">Page 8</a>                                                                                                                                                                             |
| Role of sponsor or funder         | 5c      | Describe roles of funder(s), sponsor(s), and/or institution(s), if any, in developing the protocol - <a href="#">Page 8</a>                                                                                                                            |
| <b>INTRODUCTION</b>               |         |                                                                                                                                                                                                                                                        |
| Rationale                         | 6       | Describe the rationale for the review in the context of what is already known - <a href="#">Page 4</a>                                                                                                                                                 |
| Objectives                        | 7       | Provide an explicit statement of the question(s) the review will address with reference to participants, interventions, comparators, and outcomes (PICO) - <a href="#">Page 4</a>                                                                      |
| <b>METHODS</b>                    |         |                                                                                                                                                                                                                                                        |
| Eligibility criteria              | 8       | Specify the study characteristics (such as PICO, study design, setting, time frame) and report characteristics (such as years considered, language, publication status) to be used as criteria for eligibility for the review <a href="#">Page 4-5</a> |
| Information sources               | 9       | Describe all intended information sources (such as electronic databases, contact with study authors, trial registers or other grey literature sources) with planned dates of coverage <a href="#">Page 5</a>                                           |
| Search strategy                   | 10      | Present draft of search strategy to be used for at least one electronic database, including planned limits, such that it could be repeated <a href="#">Supplementary Table 1</a>                                                                       |
| Study records:                    |         |                                                                                                                                                                                                                                                        |
| Data management                   | 11a     | Describe the mechanism(s) that will be used to manage records and data throughout the review <a href="#">Page 5</a>                                                                                                                                    |

|                                    |     |                                                                                                                                                                                                                                                                             |
|------------------------------------|-----|-----------------------------------------------------------------------------------------------------------------------------------------------------------------------------------------------------------------------------------------------------------------------------|
| Selection process                  | 11b | State the process that will be used for selecting studies (such as two independent reviewers) through each phase of the review (that is, screening, eligibility and inclusion in meta-analysis) <a href="#">Page 5</a>                                                      |
| Data collection process            | 11c | Describe planned method of extracting data from reports (such as piloting forms, done independently, in duplicate), any processes for obtaining and confirming data from investigators <a href="#">Page 5-6</a>                                                             |
| Data items                         | 12  | List and define all variables for which data will be sought (such as PICO items, funding sources), any pre-planned data assumptions and simplifications <a href="#">Page 5-6</a>                                                                                            |
| Outcomes and prioritization        | 13  | List and define all outcomes for which data will be sought, including prioritization of main and additional outcomes, with rationale <a href="#">Pages 4-5</a>                                                                                                              |
| Risk of bias in individual studies | 14  | Describe anticipated methods for assessing risk of bias of individual studies, including whether this will be done at the outcome or study level, or both; state how this information will be used in data synthesis - <a href="#">Page 6</a> ; <a href="#">Page 7</a>      |
| Data synthesis                     | 15a | Describe criteria under which study data will be quantitatively synthesised - <a href="#">Page 7</a>                                                                                                                                                                        |
|                                    | 15b | If data are appropriate for quantitative synthesis, describe planned summary measures, methods of handling data and methods of combining data from studies, including any planned exploration of consistency (such as $I^2$ , Kendall's $\tau$ ) - <a href="#">Page 6-7</a> |
|                                    | 15c | Describe any proposed additional analyses (such as sensitivity or subgroup analyses, meta-regression) - <a href="#">Page 7</a>                                                                                                                                              |
|                                    | 15d | If quantitative synthesis is not appropriate, describe the type of summary planned - <a href="#">Not applicable. Quantitative synthesis appropriate</a>                                                                                                                     |
| Meta-bias(es)                      | 16  | Specify any planned assessment of meta-bias(es) (such as publication bias across studies, selective reporting within studies) - <a href="#">Page 6</a>                                                                                                                      |
| Confidence in cumulative evidence  | 17  | Describe how the strength of the body of evidence will be assessed (such as GRADE) - <a href="#">Page 6</a>                                                                                                                                                                 |

**\* It is strongly recommended that this checklist be read in conjunction with the PRISMA-P Explanation and Elaboration (cite when available) for important clarification on the items. Amendments to a review protocol should be tracked and dated. The copyright for PRISMA-P (including checklist) is held by the PRISMA-P Group and is distributed under a Creative Commons Attribution Licence 4.0.**

*From: Shamseer L, Moher D, Clarke M, Ghersi D, Liberati A, Petticrew M, Shekelle P, Stewart L, PRISMA-P Group. Preferred reporting items for systematic review and meta-analysis protocols (PRISMA-P) 2015: elaboration and explanation. *BMJ*. 2015 Jan 2;349(jan02 1):g7647.*
