# Supplementary material for: Intranasal antihistamines and corticosteroids in the treatment of allergic rhinitis: a systematic review and meta-analysis protocol
Source: PubMed Central journal article supplement — BMJ Open. 2023 Nov 2;13(11):e076614. doi: 10.1136/bmjopen-2023-076614 (PMC10626820; doi:10.1136/bmjopen-2023-076614), 2023-11-02
Supplement: bmjopen-2023-076614supp001.pdf [file bmjopen-2023-076614supp001.pdf]

**Supplementary Table 1. Queries applied in the different bibliographic databases**

| MEDLINE (Ovid) |                                       |
|----------------|---------------------------------------|
| 1              | azelastin\$.mp.                       |
| 2              | azelastine-fluticasone.mp.            |
| 3              | azeflu.mp.                            |
| 4              | MP-azeflu.mp.                         |
| 5              | (azelastine adj2 fluticasone).mp.     |
| 6              | dymista.mp.                           |
| 7              | azecort.mp.                           |
| 8              | olopatadin\$.mp.                      |
| 9              | olopatadine-mometasone.mp.            |
| 10             | (olopatadine adj2 mometasone).mp.     |
| 11             | gsp301.mp.                            |
| 12             | ryaltris.mp.                          |
| 13             | levocabastin\$.mp.                    |
| 14             | lexicomp.mp.                          |
| 15             | ciclesonid\$.mp.                      |
| 16             | Alvesco.mp.                           |
| 17             | fluticason\$.mp.                      |
| 18             | GW685698X.mp.                         |
| 19             | mometason\$.mp.                       |
| 20             | beclometason\$.mp.                    |
| 21             | budesonid\$.mp.                       |
| 22             | triamcinolon\$.mp.                    |
| 23             | azelastine.nm.                        |
| 24             | levocabastine.nm.                     |
| 25             | ciclesonide.nm.                       |
| 26             | exp Olopatadine Hydrochloride/        |
| 27             | exp Fluticasone/                      |
| 28             | exp Mometasone Furoate/               |
| 29             | exp Beclomethasone/                   |
| 30             | exp Budesonide/                       |
| 31             | exp Triamcinolone/                    |
| 32             | exp Rhinitis/                         |
| 33             | (rhinit\$ or rhinoconjunctivit\$).mp. |
| 34             | exp Allergic Rhinitis/                |

- 35 (hayfever or "hay fever" or pollenosis or pollinosis or SAR).mp.
- 36 (spray or aerosol or powder or inhal\$ or solution or turbuhaler or intranasal\$ or (intra  
adj1 nasal) or topical\$ or nose or nostril\$).mp.
- 37 exp Administration, Topical/  
38 exp Administration, Intranasal/  
39 or/1-31  
40 or/32-35  
41 or/36-38  
42 39 and 40 and 41  
43 randomized controlled trial.pt.  
44 controlled clinical trial.pt.  
45 randomized.ab.  
46 placebo.ab.  
47 clinical trials as topic.sh.  
48 randomly.ab.  
49 trial.ti.  
50 43 or 44 or 45 or 46 or 47 or 48 or 49  
51 exp animals/ not humans.sh.  
52 50 not 51  
53 42 and 52

#### CENTRAL (CRS Web)

- 1 (azelastin\*):ti,ab,kw OR (azelastine-fluticasone):ti, ab,kw OR (azeflu):ti,ab,kw OR  
(mp-azeflu):ti, ab,kw OR (azelastine AND fluticasone):ti,ab,kw
- 2 (dymista):ti,ab,kw OR (azecort):ti, ab,kw OR (olopatadin\*):ti,ab, kw OR (olopatadine-  
mometasone):ti, ab, kw OR ((olopatadine AND mometasone)):ti,ab,kw
- 3 (gsp301):ti,ab,kw OR (ryaltris):ti,ab,kw OR (levocabastin\*):ti,ab,kw OR (lexicomp):ti,  
ab, kw OR (ciclesonid\*):ti,ab,kw
- 4 (alvesco):ti,ab,kw OR (fluticason\*):ti,ab, kw OR (gw685698x):ti, ab, kw OR  
(mometason\*):ti, ab, kw OR (beclometason\*):ti,ab,kw
- 5 (budesonid\*):ti,ab,kw OR (triamcinolon\*):ti, ab,kw
- 6 MESH DESCRIPTOR: [Olopatadine Hydrochloride] EXPLODE ALL
- 7 MESH DESCRIPTOR: [Fluticasone] EXPLODE ALL
- 8 MESH DESCRIPTOR: [Mometasone Furoate] EXPLODE ALL
- 9 MESH DESCRIPTOR: [Beclomethasone] EXPLODE ALL
- 10 MESH DESCRIPTOR: [Budesonide] EXPLODE ALL
- 11 MESH DESCRIPTOR: [Triamcinolone] EXPLODE ALL

- 12 #1 OR #2 OR #3 OR #4 OR #5 OR #6 OR #7 OR #8 OR #9 OR #10 OR #11
- 13 MESH DESCRIPTOR: [Rhinitis] EXPLODE ALL
- 14 (rhinit\*):ti,ab,kw OR (rhinoconjunctivit\*):ti, ab,kw
- 15 MESH DESCRIPTOR: [Rhinitis, Allergic] EXPLODE ALL
- 16 (hayfever):ti,ab, kw OR ("hay fever"):ti, ab, kw OR (pollenosis):ti,ab,kw OR (pollinosis):ti, ab, kw OR ("SAR"):ti,ab,kw
- 17 #13 OR #14 OR # 15 OR #16
- 18 (spray\*):ti,ab,kw OR (aerosol):ti, ab, kw OR (powder):ti,ab,kw OR (inhal\*):ti,ab, kw OR (solution):ti,ab,kw
- 19 (turbuhaler):ti, ab,kw OR (intranasal\*):ti,ab,kw OR (nasal):ti, ab,kw OR (topical\*):ti, ab,kw OR (nose):ti, ab,kw
- 20 (nostril\*):ti,ab,kw
- 21 MESH DESCRIPTOR: [Administration, Topical] EXPLODE ALL
- 22 MESH DESCRIPTOR: [Administration, Intranasal] EXPLODE ALL
- 23 #18 OR #19 OR #20 OR #21 OR #22
- 24 #12 AND #17 AND #23

### Embase

- 1 (azelastin\$ or azelastine-fluticasone or azeflu or MP-azeflu or (azelastine adj2 fluticasone) or dymista or azecort or olopatadin\$ or olopatadine-mometasone or (olopatadine adj2 mometasone) or gsp301 or rryaltris or levocabastin\$ or lexicomp or ciclesonid\$ or Alvesco or fluticason\$ or GW685698X or mometason\$ or beclometason\$ or budesonid\$ or triamcinolon\$).tw.
- 2 (rhinit\$ or rhinoconjunctivit\$ or hayfever or "hay fever" or pollenosis or pollinosis).tw.
- 3 (((spray\$ or aerosol or powder or inhal\$ or solution or turbuhaler or intranasal\$).tw. or intra.mp.) adj1 nasal.tw.) or topical\$.tw. or nose.tw. or nostril\$.tw. or nasal.tw.
- 4 1 and 2 and 3
- 5 randomized controlled trial/
- 6 controlled clinical study/
- 7 5 or 6
- 8 random\$.ti,ab.
- 9 randomization/
- 10 intermethod comparison/
- 11 placebo.ti,ab
- 12 (compare or compared or comparison).ti.
- 13 ((evaluated or evaluate or evaluating or assessed or assess) and (compare or compared or comparing or comparison)).ab.

- 14 (open adj label).ti,ab.  
 15 ((double or single or doubly or singly) adj (blind or blinded or blindly)).ti,ab.  
 16 double blind procedure/  
 17 parallel group\$1.ti,ab.  
 18 (crossover or cross over).ti, ab.  
 19 ((assign\$ or match or matched or allocation) adj5 (alternate or group\$1 or intervention\$1 or patient\$1 or subject\$1 or participant\$1)).ti,ab.  
 20 (assigned or allocated).ti,ab.  
 21 (controlled adj7 (study or design or trial)).ti,ab.  
 22 (volunteer or volunteers).ti,ab.  
 23 human experiment/  
 24 trial.ti.  
 25 8 or 9 or 10 or 11 or 12 or 13 or 14 or 15 or 16 or 17 or 18 or 19 or 20 or 21 or 22 or 23 or 24  
 26 25 not 7  
 27 (((case adj control\$) and random\$) not randomi?ed controlled).ti,ab.  
 28 (Systematic review not (trial or study)).ti.  
 29 (nonrandom\$ not random\$).ti, ab.  
 30 "Random field\$".ti,ab.  
 31 (random cluster adj3 sampl\$).ti,ab.  
 32 (review.ab. and review.pt.) not trial.ti.  
 33 "we searched".ab. and (review.ti. or review.pt.)  
 34 "update review".ab.  
 35 (databases adj4 searched).ab.  
 36 (rat or rats or mouse or mice or swine or porcine or murine or sheep or lambs or pigs or piglets or rabbit or rabbits or cat or cats or dog or dogs or cattle or bovine or monkey or monkeys or trout or marmoset\$1).ti. and animal experiment/  
 37 37 Animal experiment/not (human experiment/or human/  
 38 or/27-37  
 39 26 not 38  
 40 4 and 39

### Web of Science

- 1 TS=(azelastin\* OR azelastine-fluticasone OR azeflu OR MP-azeflu OR (azelastine NEAR/2 fluticasone) OR dymista OR azecort OR olopatadin\* OR olopatadine-mometasone OR (olopatadine NEAR/2 mometasone) OR gsp301 OR ryaltris OR

- levocabastin\* OR lexicomp OR ciclesonid\* OR Alvesco OR fluticason\* OR GW685698X OR mometason\* OR beclometason\* OR budesonid\* OR triamcinolon\*)
- 2 TS=(rhinit\* or rhinoconjunctivit\*) OR TS=(hayfever or "hay fever" or pollenosis or pollinosis or SAR)
  - 3 TS=(spray or aerosol or powder or inhal\* or solution or turbuhaler or intranasal\* or (intra NEAR/1 nasal) or topical\* or nose or nostril\*)
  - 4 TS=(randomised OR randomized OR randomisation OR randomisation OR placebo\* OR (random\* AND (allocat\* OR assign\*)) OR (blind\* AND (single OR double OR treble OR triple)))
  - 5 TS=(animal or animals or pisces or fish or fishes or catfish or catfishes or sheatfish or silurus or arius or heteropneustes or clarias or gariepinus or fathead minnow or fathead minnows or pimephales or promelas or cichlidae or trout or trouts or char or chars or salvelinus or salmo or oncorhynchus or guppy or guppies or millionfish or poecilia or goldfish or goldfishes or carassius or auratus or mullet or mullets or mugil or curema or shark or sharks or cod or cods or gadus or morhua or carp or carps or cyprinus or carpio or killifish or eel or eels or anguilla or zander or sander or lucioperca or stizostedion or turbot or turbots or psetta or flatfish or flatfishes or plaice or pleuronectes or platessa or tilapia or tilapias or oreochromis or sarotherodon or common sole or dover sole or solea or zebrafish or zebrafishes or danio or rerio or seabass or dicentrarchus or labrax or morone or lamprey or lampreys or petromyzon or pumpkinseed or pumpkinseeds or lepomis or gibbosus or herring or clupea or harengus or amphibia or amphibian or amphibians or anura or salientia or frog or frogs or rana or toad or toads or bufo or xenopus or laevis or bombina or epidalea or calamita or salamander or salamanders or newt or newts or triturus or reptilia or reptile or reptiles or bearded dragon or pogona or vitticeps or iguana or iguanas or lizard or lizards or anguis fragilis or turtle or turtles or snakes or snake or aves or bird or birds or quail or quails or coturnix or bobwhite or colinus or virginianus or poultry or poultries or fowl or fowls or chicken or chickens or gallus or zebra finch or taeniopygia or guttata or canary or canaries or serinus or canaria or parakeet or parakeets or grasskeet or parrot or parrots or psittacine or psittacines or shelduck or tadorna or goose or geese or branta or leucopsis or woodlark or lullula or flycatcher or ficedula or hypoleuca or dove or doves or geopelia or cuneata or duck or ducks or greylag or graylag or anser or harrier or circus pygargus or red knot or great knot or calidris or canutus or godwit or limosa or lapponica or meleagris or gallopavo or jackdaw or corvus or monedula or ruff or philomachus or pugnax or lapwing or peewit or plover or vanellus or swan or cygnus or columbianus or bewickii or gull or chroicocephalus or ridibundus or albifrons or

great tit or parus or aythya or fuligula or streptopelia or risoria or spoonbill or platalea or leucorodia or blackbird or turdus or merula or blue tit or cyanistes or pigeon or pigeons or columba or pintail or anas or starling or sturnus or owl or athene noctua or pochard or ferina or cockatiel or nymphius or hollandicus or skylark or alauda or tern or sterna or teal or crecca or oystercatcher or haematopus or ostralegus or shrew or shrews or sorex or araneus or crocidura or russula or european mole or talpa or chiroptera or bat or bats or eptesicus or serotinus or myotis or dasycneme or daubentonii or pipistrelle or pipistrellus or cat or cats or felis or catus or feline or dog or dogs or canis or canine or canines or otter or otters or lutra or badger or badgers or meles or fitchew or fitch or foumart or foulmart or ferrets or ferret or polecat or polecats or mustela or putorius or weasel or weasels or fox or foxes or vulpes or common seal or phoca or vitulina or grey seal or halichoerus or horse or horses or equus or equine or equidae or donkey or donkeys or mule or mules or pig or pigs or swine or swines or hog or hogs or boar or boars or porcine or piglet or piglets or sus or scrofa or llama or llamas or lama or glama or deer or deers or cervus or elaphus or cow or cows or bos taurus or bos indicus or bovine or bull or bulls or cattle or bison or bisons or sheep or sheeps or ovis aries or ovine or lamb or lambs or mouflon or mouflons or goat or goats or capra or caprine or chamois or rupicapra or leporidae or lagomorpha or lagomorph or rabbit or rabbits or oryctolagus or cuniculus or laprine or hares or lepus or rodentia or rodent or rodents or murinae or mouse or mice or mus or musculus or murine or woodmouse or apodemus or rat or rats or rattus or norvegicus or guinea pig or guinea pigs or cavia or porcellus or hamster or hamsters or mesocricetus or cricetus or cricetus or gerbil or gerbils or jird or jirds or meriones or unguiculatus or jerboa or jerboas or jaculus or chinchilla or chinchillas or beaver or beavers or castor fiber or castor canadensis or sciuridae or squirrel or squirrels or sciurus or chipmunk or chipmunks or marmot or marmots or marmota or suslik or susliks or spermophilus or cynomys or cottonrat or cottonrats or sigmodon or vole or voles or microtus or myodes or glareolus or primate or primates or prosimian or prosimians or lemur or lemurs or lemuridae or loris or bush baby or bush babies or bushbaby or bushbabies or galago or galagos or anthropoidea or anthropoids or simian or simians or monkey or monkeys or marmoset or marmosets or callithrix or cebuella or tamarin or tamarins or saguinus or leontopithecus or squirrel monkey or squirrel monkeys or saimiri or night monkey or night monkeys or owl monkey or owl monkeys or douroucoulis or aotus or spider monkey or spider monkeys or ateles or baboon or baboons or papio or rhesus monkey or macaque or macaca or mulatta or cynomolgus or fascicularis or green monkey or green monkeys or chlorocebus or vervet or vervets or pygerythrus or hominoidea or

ape or apes or hylobatidae or gibbon or gibbons or siamang or siamangs or nomascus  
or symphalangus or hominidae or orangutan or orangutans or pongo or chimpanzee or  
chimpanzees or pan troglodytes or bonobo or bonobos or pan paniscus or gorilla or  
gorillas or troglodytes)

6 #4 NOT #5

7 #1 AND #2 AND #3 AND #6

---
